# Supplementary material
Source: ML conference proceedings conference paper supplement (https://openreview.net/forum?id=5aeyKAZr0L)
Supplement: supplementary_material [file attachment]

547 **A Graph Neural Networks (GNNs)**

548 We consider standard message-passing graph neural networks (MPNNs) [19-21] defined as follows.  
 549 A  $L$ -layer MPNN maps input  $X \in \mathbb{R}^{N \times d}$  to output  $Y \in \mathbb{R}^{N \times k}$  following an iterative scheme: At  
 550 initialization,  $\mathbf{h}^{(0)} = X$ ; At each iteration  $l$ , the embedding for node  $i$  is updated to

$$\mathbf{h}_i^{(l)} = \phi \left( \mathbf{h}_i^{(l-1)}, \sum_{j \in \mathcal{N}(i)} \psi \left( \mathbf{h}_i^{(l-1)}, \mathbf{h}_j^{(l-1)}, A_{[i,j]} \right) \right), \quad (7)$$

551 where  $\phi, \psi$  are the update and message functions,  $\mathcal{N}(i)$  denotes the neighbors of node  $i$ , and  $A_{[i,j]}$   
 552 represents the  $(i, j)$ -edge weight. MPNNs typically have two key design features: (1)  $\phi, \psi$  are *shared*  
 553 across all nodes in the graph, typically chosen to be a linear transformation or a multi-layer perceptions  
 554 (MLPs), known as *global weight sharing*; (2) the graph  $A$  is used for (spatial) convolution.

555 **B Parameterization of Linear Equivariant Maps**

556 We consider a group  $\mathcal{G}$  acting on spaces  $\mathcal{X}$  and  $\mathcal{Y}$  via representations  $\phi$  and  $\psi$ , respectively. Our goal  
 557 is to find the linear equivariant maps  $f : \mathcal{X} \rightarrow \mathcal{Y}$  such that  $f(\phi(g)x) = \psi(g)f(x)$  for all  $g \in \mathcal{G}$  and  
 558  $x \in \mathcal{X}$ . The standard way to do this, used extensively in the equivariant machine learning literature  
 559 (e.g. [40, 43]), is to decompose  $\phi$  and  $\psi$  in irreducibles and use Schur’s lemma.

560 In a nutshell, a group representation  $\varphi$  is an homomorphism  $\mathcal{G} \rightarrow \text{GL}(V)$  (sometimes mathematicians  
 561 say that  $V$  is a representation of  $\mathcal{G}$ , but we need to know the homomorphism  $\varphi$  too). One way to  
 562 interpret the group homomorphism (i.e.  $\varphi(gh) = \varphi(g) \circ \varphi(h)$ ) is that the group multiplication  
 563 corresponds to the composition of linear invertible maps (i.e. matrix multiplication). A linear subspace  
 564  $W$  of  $V$  is said to be a subrepresentation of  $\varphi$  if  $\varphi(\mathcal{G})(W) \subset W$ . A irreducible representation is one  
 565 that only has itself and the trivial subspace as subrepresentations.

566 Schur’s lemma states that if  $V, W$  are vector spaces over  $\mathbb{C}$  and  $\varphi_V, \varphi_W$  are irreducible repre-  
 567 sentations, then either (1)  $\varphi_V$  and  $\varphi_W$  are not isomorphic as representations (and the only linear  
 568 equivariant map between  $V, W$  is the zero map), or (2)  $\varphi_V$  and  $\varphi_W$  are isomorphic and the only  
 569 non-trivial equivariant maps are of the form  $\lambda I$  where  $\lambda \in \mathbb{C}$  and  $I$  is the identity (See Chapter 1 of  
 570 [60]).

571 Now given  $\mathcal{G}$  acting on spaces  $\mathcal{X}$  and  $\mathcal{Y}$  via representations  $\phi$  and  $\psi$ , respectively. Then one can  
 572 decompose  $\phi$  and  $\psi$  in irreducibles over  $\mathbb{C}$

$$\phi = \bigoplus_{k=1}^{\ell} a_k \mathcal{T}_k \quad \psi = \bigoplus_{k=1}^{\ell} b_k \mathcal{T}_k$$

573 (this notation assumes the same irreducibles appear in both decompositions, which can be done if  
 574 we allow some of the  $a_k$  and  $b_k$  to be zero). And then one can parameterize the equivariant maps by  
 575 having one complex parameter per irreducible that appears in both decompositions. These ideas can  
 576 be applied to real spaces.

577 Then finding the linear equivariant maps reduces to decomposing the corresponding representations  
 578 in irreducibles. In the next sections we explain in detail how to do this for the specific problems  
 579 described in this paper. The appendix is organized as follows: We first show how to parameterize  
 580 equivariant linear layers for Abelian group (Section B.1.1), and then provide the end-to-end design of  
 581 equivariant graph networks  $\mathcal{G}$ -Net (Section B.3).

582 **B.1 Equivariant Linear Maps via Isotypical Decomposition**

583 In this section, we assume that the graph adjacency matrix  $A$  has distinct eigenvalues  $\lambda_1 > \lambda_2 >$   
 584  $\dots > \lambda_n$ . Then  $\mathcal{A}_G$  is an Abelian group (Lemma 3.8.1, notes). Under this assumption, we present  
 585 the construction of approximately equivariant graph networks using isotypical decomposition (i.e.  
 586 decomposition into isomorphism classes of irreducible representations) and group characters. We  
 587 remark that such construction extends to non-Abelian groups and refer the interested reader to [68],  
 588 but we omit it here for the ease of exposition.

589 **B.1.1 Equivariant Linear Layers for Abelian Group**

590 We consider the simplest setting where  $f : \mathbb{R}^N \rightarrow \mathbb{R}^N$  is a linear function that maps signals on the  
 591 node level. Let  $x \in \mathbb{R}^N$  be the node features, then equivariance requires

$$f(gx) = g f(x) \quad \text{for all } g \in \mathcal{A}_G. \quad (8)$$

592 To construct linear equivariant functions  $f$ , our roadmap is outlined as follows:

- 593 1. Decompose the vector space  $\mathcal{X} = \mathbb{R}^N$  into a sum of components such that different  
 594 components cannot be mapped to each other equivariantly (also known as the isotypic  
 595 decomposition);
- 596 2. Given  $\mathcal{X} = \oplus_i \mathcal{X}_i$  an isotypic representation, we then parameterize  $f$  by linear maps at each  
 597  $\mathcal{X}_i$  such that for all  $i, f(\mathcal{X}_i) \subseteq \mathcal{X}_i$ .

598 To this end, we need the following definitions.

599 **Definition 5.** ( *$\mathcal{G}$ -module, [68] Defn 1.3.1*) Let  $\mathcal{X}$  be a vector space and  $\mathcal{G}$  be a group. We say the  
 600 vector space  $\mathcal{X}$  is a  $\mathcal{G}$ -module or  $\mathcal{X}$  carries a representation of  $\mathcal{G}$  if there is a group homomorphism  
 601  $\rho : \mathcal{G} \rightarrow GL(\mathcal{X})$ , where  $GL$  denotes the General Linear group. Equivalently, if the following holds:

- 602 1.  $gv \in \mathcal{X}$ ,
- 603 2.  $g(cv + dw) = c(gv) + d(gw)$ ,
- 604 3.  $(gh)v = g(hv)$ ,
- 605 4.  $ev = v$

606 for all  $g, h \in \mathcal{G}; v, w \in \mathcal{X}$  and scalars  $c, d \in \mathbb{C}$  ( $e \in \mathcal{G}$  denotes the identity element).

607 In what follows, we consider  $\mathcal{X} = \mathbb{R}^N$  carries a representation of  $G$ .

608 **Definition 6.** (*Group characters*) Let  $X(g), g \in \mathcal{G}$  be a matrix representation of a group element.  
 609 Then the character of  $X$  is  $\chi(g) := \text{tr } X(g)$ .

610 **Definition 7.** (*Group orbits*) Let  $\mathcal{X}$  be a vector space and  $\mathcal{G}$  be a group. The group orbit of an element  
 611  $x \in \mathcal{X}$  is  $O(x) := \{gx : g \in \mathcal{G}\}$ .

612 Let  $g_1, \dots, g_s$  be the generators of  $\mathcal{A}_G \subset (\mathcal{S}_2)^n$ , or simply  $\mathcal{A}_G \equiv (\mathcal{S}_2)^k$  for some  $k \leq n$ . Since  $\mathcal{A}_G$   
 613 is abelian, any irreducible representation is 1-dimensional [60, p.8]. In other words, the irreducible  
 614 representations of an abelian group are homomorphisms

$$\rho : \mathcal{A}_G \rightarrow \mathbb{C}. \quad (9)$$

615 Since all the elements of the group  $\mathcal{A}_G = (\mathcal{S}_2)^k$  is of order 1 or 2, the homomorphisms are  $\rho : \mathcal{A}_G \rightarrow$   
 616  $\{\pm 1\} \subset \mathbb{R}$ . By Defn 6, the irreducible characters (i.e., characters of irreducible matrix representation)  
 617 are also homomorphisms  $\rho : \mathcal{A}_G \rightarrow \{\pm 1\}$ . In other words,  $\chi(g) \in \{\pm 1\}$  for all  $g \in \mathcal{A}_G$ . Then we  
 618 can write down the  $2^k \times 2^k$  character table, where the rows are the characters  $\chi$ , and the columns are  
 619 the group elements  $g \in \mathcal{A}_G$  (see Table 3 as an example). Now, define the projection onto the isotypic  
 620 component of the representation  $X$  as

$$P_\chi := \frac{\text{deg}(X)}{|\mathcal{A}_G|} \sum_{g \in \mathcal{A}_G} \overline{\chi(g)} g = \frac{1}{|\mathcal{A}_G|} \sum_{g \in \mathcal{A}_G} \chi(g) g, \quad (10)$$

621 where the second equality uses the fact that  $\mathcal{A}_G$  is abelian.

622 Intuitively, applying  $P_\chi$  on  $\mathcal{X} = \text{span}(\{e_1, \dots, e_N\})$  picks out all  $v \in \mathcal{X}$  that stays in the same  
 623 subspace defined by the group character  $\chi$ . (Note that for the  $(\mathcal{S}_2)^k$  case  $\chi^{-1}(g) = \chi(g)$  since  
 624  $\chi(g) \in \{\pm 1\}$ ).

625 We are ready to present the precise construction of linear equivariant map  $f$  with respect to an Abelian  
 626 group:

627 **Lemma 5.**  $f$  is linear, equivariant with respect to the abelian group  $\mathcal{A}_G$  if and only if  $f$  can be  
 628 written as (I2) in Algorithm I

---

**Algorithm 1** Parameterizing linear equivariant functions  $f : \mathbb{R}^N \rightarrow \mathbb{R}^N$  for abelian group

---

**Require:** Abelian group  $\mathcal{A}_G = (\mathcal{S}_2)^k$

1. Construct the character table of  $\chi_{\text{irreps}}$  for  $\mathcal{A}_G$ , i.e.  $\chi_i : \mathcal{A}_G \rightarrow \{\pm 1\}$   $i = 1, \dots, \ell$ ;
2. For each character  $\chi_i$  in the character table, compute the projection matrix

$$P_{\chi_i}(\mathcal{X}) = [P_{\chi_i}(e_1); \dots; P_{\chi_i}(e_N)] \in \mathbb{R}^{N \times N}; \quad (11)$$

followed by computing the basis from  $P_{\chi_i}(\mathcal{X})$  and call it  $\mathcal{X}_{\chi_i} = [b_{\chi_i}^{(1)}, \dots, b_{\chi_i}^{(K_i)}]$ .

3.  $\mathcal{X} = \bigoplus_{i=1}^{\ell} \mathcal{X}_{\chi_i}$  where  $\mathcal{X}_{\chi_i}$  are the isotypic component. Then  $f$  is any linear function satisfying that  $f(\mathcal{X}_{\chi_i}) \subseteq \mathcal{X}_{\chi_i}$  for all  $i = 1, \dots, \ell$ . In particular, in the basis  $[b_{\chi_i}^{(s)}]_{1 \leq i \leq \ell, 1 \leq s \leq K_i}$   $f$  can be written as a block diagonal matrix  $\mathbb{R}^{n \times n}$  with each block  $M_{\chi_i}$  being the linear map from  $\mathcal{X}_{\chi_i} \rightarrow \mathcal{X}_{\chi_i}$ ,

$$f = \begin{bmatrix} M_{\chi_1} & & & \\ & M_{\chi_2} & & \\ & & \ddots & \\ & & & M_{\chi_\ell} \end{bmatrix} \quad (12)$$

**return**  $f$

---

|                | e | σ  |
|----------------|---|----|
| χ <sub>e</sub> | 1 | 1  |
| χ <sub>2</sub> | 1 | -1 |

Table 3: Character table for  $\text{aut}(P_4) \cong Z_2$

629 *Proof.* By construction in Algorithm 1,  $f$  is linear and equivariant. To show the converse, since  $\mathcal{A}_G$   
 630 is abelian with all irreducible representations being one-dimensional, for  $\mathcal{X}_{\chi_1} \not\cong \mathcal{X}_{\chi_2}$ , we have

$$g v_1 = \lambda_1(g) v_1, \quad \text{for all } g \in \mathcal{G}, v_1 \in \mathcal{X}_{\chi_1}, \quad (13)$$

$$g v_2 = \lambda_2(g) v_2, \quad \text{for all } g \in \mathcal{G}, v_2 \in \mathcal{X}_{\chi_2}, \quad (14)$$

631 where there exists some  $g \in \mathcal{G}$  such that  $\lambda_1(g) \neq \lambda_2(g)$ . To show  $f$  being linear and equivariant  
 632 implies for all  $v \in \mathcal{X}_\chi$ ,  $f(v) \in \mathcal{X}_\chi$ , we prove by contradiction. Without loss of generality, suppose

$$f(v_{\chi_1}) = \alpha_1 v_{\chi_1} + \alpha_2 v_{\chi_2}, \quad (15)$$

633 for some scalars  $\alpha_1, \alpha_2$  and  $v_{\chi_1} \in \mathcal{X}_{\chi_1}, v_{\chi_2} \in \mathcal{X}_{\chi_2}$ . Then by (13), for all  $g \in \mathcal{G}$ ,

$$f(g v_{\chi_1}) = f(\lambda_1(g) v_{\chi_1}) = \lambda_1(g) f(v_{\chi_1}) = \lambda_1(g) \alpha_1 v_{\chi_1} + \lambda_1(g) \alpha_2 v_{\chi_2}. \quad (16)$$

634 Now, since  $f$  is equivariant, for all  $g \in \mathcal{G}$ ,

$$f(g v_{\chi_1}) = g f(v_{\chi_1}) = g(\alpha_1 v_{\chi_1} + \alpha_2 v_{\chi_2}) = \lambda_1(g) \alpha_1 v_{\chi_1} + \lambda_2(g) \alpha_2 v_{\chi_2}. \quad (17)$$

635 But there exists some  $g' \in \mathcal{G}$  such that  $\lambda_1(g') \neq \lambda_2(g')$ , which leads to  $f(g' v_{\chi_1}) \neq f(g' v_{\chi_1})$ , a  
 636 contradiction. One can easily extend the proof strategy to the general case for  $f(v_{\chi_1}) = \sum_{i=1}^l v_{\chi_i}$ .  
 637 □

638 **Example B.1.** Consider the path graph on 4 nodes (i.e.,  $P_4$ ). We have  $\text{aut}(P_4) = \{e, (14)(23)\} \cong$   
 639  $Z_2$ .

640 Steps 1: Note that  $Z_2$  is Abelian and thus all irreducible characters  $\chi(g) \in \{\pm 1\}$ , for all  $g \in Z_2$ . The  
 641 character table is shown in Table 3

642 Step 2: using (10) we have

$$P_{\chi_e}[e_1; e_2; e_3; e_4] = \frac{1}{2} \begin{bmatrix} 1 & 0 & 0 & 1 \\ 0 & 1 & 1 & 0 \\ 0 & 1 & 1 & 0 \\ 1 & 0 & 0 & 1 \end{bmatrix} \text{ which yields basis } \mathcal{B}(P_{\chi_e}) = [e_1 + e_4; e_2 + e_3].$$

$$P_{\chi_2}[e_1; e_2; e_3; e_4] = \frac{1}{2} \begin{bmatrix} 1 & 0 & 0 & -1 \\ 0 & 1 & -1 & 0 \\ 0 & -1 & 1 & 0 \\ -1 & 0 & 0 & 1 \end{bmatrix} \text{ which yields basis } \mathcal{B}(P_{\chi_2}) = [e_1 - e_4; e_2 - e_3].$$

643 Step 3: Parameterize  $f : \mathbb{R}^4 \rightarrow \mathbb{R}^4$  by  $f : \mathcal{B}(P_{\chi_e}) \rightarrow \mathcal{B}(P_{\chi_e})$  and  $f : \mathcal{B}(P_{\chi_2}) \rightarrow \mathcal{B}(P_{\chi_2})$ , i.e. for all  
644  $v \in \mathbb{R}^4$ , let  $v = c_1(e_1 + e_4) + \dots + c_4(e_2 - e_3)$ , then

$$f(v) = \begin{bmatrix} \alpha_1 & \alpha_2 \\ \alpha_3 & \alpha_4 \end{bmatrix} [c_1; c_2] + \begin{bmatrix} \alpha_5 & \alpha_6 \\ \alpha_7 & \alpha_8 \end{bmatrix} [c_3; c_4], \quad (18)$$

645 where  $\alpha_1, \dots, \alpha_8$  are (learnable) real scalars. Now  $f$  is linear, equivariant by construction.

## 646 B.2 Equivariant Linear Map for Symmetries Induced by Graph Coarsening

647 In this section, we present the construction of equivariant linear maps for some examples using the  
648 symmetry group induced by graph coarsening (Defn 3). Recall the symmetry group with  $M$  clusters  
649 of  $G$  (with the associated coarsened graph  $G'$ ) is given by

$$\mathcal{G}_{G \rightarrow G'} := (\mathcal{S}_1 \times \mathcal{S}_2 \dots \times \mathcal{S}_M) \rtimes \overline{\mathcal{A}}_{G'} \subset \mathcal{S}_N.$$

650 Here we assume that  $\overline{\mathcal{A}}_{G'}$  is trivial and we show how to parameterize equivariant functions with  
651 respect to products of permutations. In more general cases, for instance if  $\overline{\mathcal{A}}_{G'}$  is abelian, we can use  
652 a construction by Serre ([69] Section 8.2). For the ease of exposition, consider  $X \in \mathbb{R}^N, Y \in \mathbb{R}^N$ .  
653 Then any permutation-equivariant linear function  $f : \mathbb{R}^N \rightarrow \mathbb{R}^N$  with respect to  $\mathcal{G}_{G \rightarrow G'}$  admits the  
654 following block-matrix form:

$$f = \begin{bmatrix} f_{11} & f_{12} & \cdots & f_{1M} \\ f_{21} & f_{22} & \cdots & f_{2M} \\ & & \ddots & \\ f_{M1} & f_{M2} & \cdots & f_{MM} \end{bmatrix}, f_{kk} = a_k \mathbf{I} + b_k \mathbf{1}\mathbf{1}^\top, f_{kl} = c_{kl} \mathbf{1}\mathbf{1}^\top \text{ for } k \neq l, \quad (19)$$

655 where  $f_{kl}$  are block matrices, and  $a_k, b_k, c_{kl}$  are scalars where  $c_{kl} = c_{lk}$  if and only if the coarsened  
656 nodes  $k, l \in G'$  are in the same group orbit. Figure 2 illustrates the block structure of  $f$ . This is due to  
657 (1)  $f_{kk}$  is a linear permutation-equivariant function if and only if its diagonal elements are the same  
658 and its off-diagonal elements are the same ([34, Lemma 3.]); (2)  $f_{kl}$  for  $k \neq l$  is a constant matrix  
659 since nodes within a cluster are indistinguishable, and  $c_{kl}$  needs to satisfy the symmetry of  $\overline{\mathcal{A}}_{G'}$ .

660 Finally, we illustrate the linear equivariant layer for two-cluster graph coarsening. Without loss of  
661 generality, assume that the adjacency matrix  $A$  and the node signals  $X$  are ordered according to the  
662 cluster assignment (e.g.,  $X_{[1:|V_1|]}$  are node features for the first cluster, etc). Let  $X_{(1)}, X_{(2)}$  denote the  
663 node features for the first and second cluster,  $W_{(1)}^s, W_{(2)}^s$  denote the weights on the block diagonal for  
664 self-feature transformation,  $W_{(1)}^n, W_{(2)}^n$  denote the weights on the block diagonal for within-cluster  
665 neighbors, and  $W_{(12)}^n, W_{(21)}^n$  denote the weights off the block diagonal for across-cluster neighbors.  
666 Let  $I$  denote the identity matrix, and  $\mathbf{1}_{(1)}, \mathbf{1}_{(2)}$  denote the all-ones matrices with the same size as the  
667 corresponding cluster. Recall  $\odot$  denotes the element-wise multiplication of two matrices. Then the  
668 linear equivariant layer is parameterized as

$$A \odot I \begin{bmatrix} X_{(1)} W_{(1)}^s \\ X_{(2)} W_{(2)}^s \end{bmatrix} + A \odot \left( \begin{bmatrix} \mathbf{1}_{(1)} & 0 \\ 0 & \mathbf{1}_{(2)} \end{bmatrix} - I \right) \begin{bmatrix} X_{(1)} W_{(1)}^n \\ X_{(2)} W_{(2)}^n \end{bmatrix} + A \odot \begin{bmatrix} 0 & \mathbf{1}_{(2)} \\ \mathbf{1}_{(1)} & 0 \end{bmatrix} \begin{bmatrix} X_{(1)} W_{(12)}^n \\ X_{(2)} W_{(21)}^n \end{bmatrix}. \quad (20)$$

## 669 B.3 Equivariant Layer for Human Skeleton Graph

670 We now apply the constructions above to our human skeleton graph described in Section 5.1. We  
671 first show how to parameterize all linear  $\mathcal{A}_G$ -equivariant functions. Observe that  $\mathcal{A}_G \cong (\mathcal{S}_2)^2 =$

$$\begin{bmatrix} \begin{bmatrix} f_{11} \end{bmatrix} & \begin{bmatrix} f_{12} \end{bmatrix} & \cdots & \begin{bmatrix} f_{1M} \end{bmatrix} \\ \begin{bmatrix} f_{21} \end{bmatrix} & \begin{bmatrix} f_{22} \end{bmatrix} & \cdots & \begin{bmatrix} f_{2M} \end{bmatrix} \\ \vdots & \vdots & & \vdots \\ \begin{bmatrix} f_{M1} \end{bmatrix} & \begin{bmatrix} f_{M2} \end{bmatrix} & \cdots & \begin{bmatrix} f_{MM} \end{bmatrix} \end{bmatrix}$$

Figure 2: The block structure of linear equivariant function  $f : \mathbb{R}^n \rightarrow \mathbb{R}^n$  with respect to  $\mathcal{G}_{G \rightarrow G'}$  (where  $G, G'$  are asymmetric): Each diagonal block  $f_{kk}$  is diagonally constant and off-diagonally constant; Each off-diagonal block  $f_{kl}$  is a constant matrix.

672  $\{e, a, l, al\}$ , where the nontrivial actions correspond to the arm flip with respect to the spine, the leg  
673 flip with respect to the spine, and their composition. To fix ideas, we first treat both input and output  
674 graph signals as vectors, and construct  $\mathcal{A}_G$ -equivariant linear maps  $f : \mathbb{R}^{16} \rightarrow \mathbb{R}^{16}$ .

675 Step 1: Obtain the character table for  $(\mathcal{S}_2)^2$

|          | $e$ | $a$ | $l$ | $al$ |
|----------|-----|-----|-----|------|
| $\chi_e$ | 1   | 1   | 1   | 1    |
| $\chi_2$ | 1   | 1   | -1  | -1   |
| $\chi_3$ | 1   | -1  | 1   | -1   |
| $\chi_4$ | 1   | -1  | -1  | 1    |

Table 4: Character table for  $(\mathcal{S}_2)^2$

676 Step 2: Construct the basis for isotypic decomposition. Here we choose to index the leg joint pairs as  
677  $(1, 4), (2, 5), (3, 6)$ , arm joint pairs as  $(10, 13), (11, 14), (12, 15)$ , and spline joints  $0, 7, 8, 9$ .

$$\begin{aligned} B &= [\mathcal{B}(P_{\chi_e}); \mathcal{B}(P_{\chi_2}); \mathcal{B}(P_{\chi_3}); \mathcal{B}(P_{\chi_4})] \text{ where} \\ \mathcal{B}(P_{\chi_e}) &= [(e_1 + e_4)/\sqrt{2}; \dots; (e_{12} + e_{15})/\sqrt{2}; e_0; e_7; e_8; e_9] \in \mathbb{R}^{16 \times 10}. \\ \mathcal{B}(P_{\chi_2}) &= [(e_1 - e_4)/\sqrt{2}; (e_2 - e_5)/\sqrt{2}; (e_3 - e_6)/\sqrt{2}] \in \mathbb{R}^{16 \times 3}; \\ \mathcal{B}(P_{\chi_3}) &= [(e_{10} - e_{13})/\sqrt{2}; (e_{11} - e_{14})/\sqrt{2}; (e_{12} - e_{15})/\sqrt{2}] \in \mathbb{R}^{16 \times 3}; \\ \mathcal{B}(P_{\chi_4}) &= \emptyset \end{aligned} \tag{21}$$

678 Step 3: Parameterize  $f : \mathbb{R}^{16} \rightarrow \mathbb{R}^{16}$  by  $f : \mathcal{B}(P_{\chi_e}) \rightarrow \mathcal{B}(P_{\chi_e})$  and  $f : \mathcal{B}(P_{\chi_2}) \rightarrow \mathcal{B}(P_{\chi_2})$ , i.e. for  
679 all  $v \in \mathbb{R}^{16}$ , let  $v = \mathcal{B}(P_{\chi_e}) \mathbf{c}_e + \mathcal{B}(P_{\chi_2}) \mathbf{c}_2 + \mathcal{B}(P_{\chi_3}) \mathbf{c}_3$ , then

$$f(v) = W_e \mathbf{c}_e + W_2 \mathbf{c}_2 + W_3 \mathbf{c}_3, \tag{22}$$

680 where  $W_e \in \mathbb{R}^{10 \times 10}$ ,  $W_2 \in \mathbb{R}^{3 \times 3}$ ,  $W_3 \in \mathbb{R}^{3 \times 3}$  are (learnable) weight matrices. Now  $f$  expresses all  
681 linear, equivariant maps w.r.t  $(\mathcal{S}_2)^2$ .

682 The following calculation based on  $f : \mathbb{R}^{16} \rightarrow \mathbb{R}^{16}$  shows how much degree of freedom (measured by  
683 learnable parameters) is gained by relaxing the symmetry from global (group  $\mathcal{S}_{16}$ ), exact  $\mathcal{A}_G \cong (\mathcal{S}_2)^2$ ,  
684 to trivial group (i.e., no symmetry).

$$f_{\mathcal{S}_{16}} = w \mathbf{I}_{16} + w' (\mathbf{1} - \mathbf{I}_{16}), \quad (2 \text{ parameters}); \tag{23}$$

$$f_{\mathcal{A}_G} = W_e \oplus W_2 \oplus W_3, \quad (118 \text{ parameters on the isotypic components}); \tag{24}$$

$$f_{\text{triv.}} = W, \quad (256 \text{ parameters}). \tag{25}$$

685 To parameterize linear equivariant function  $f : \mathbb{R}^{16 \times d} \rightarrow \mathbb{R}^{16 \times d'}$ , we proceed by decoupling the input  
686 space into  $\mathbb{R}^{10 \times d}, \mathbb{R}^{3 \times d}, \mathbb{R}^{3 \times d}$  and the output space into  $\mathbb{R}^{10 \times d'}, \mathbb{R}^{3 \times d'}, \mathbb{R}^{3 \times d'}$ . Now the learnable  
687 weight matrices for multidimensional input/output become  $W_e \in \mathbb{R}^{10d \times 10d'}, W_2 \in \mathbb{R}^{3d \times 3d'}, W_3 \in$   
688  $\mathbb{R}^{3d \times 3d'}$ . The construction is summarized in Algorithm 2.

---

**Algorithm 2** Equivariant layer  $f_{\mathcal{A}_G} : \mathbb{R}^{16 \times d} \rightarrow \mathbb{R}^{16 \times d'}$  for  $\mathcal{A}_G \cong (\mathcal{S}_2)^2$

---

**Require:** The basis  $B \in \mathbb{R}^{16 \times 16}$  in (21) for isotypic decomposition of  $\mathcal{A}_G = (\mathcal{S}_2)^2$ , input  $h^{(l)} \in \mathbb{R}^{16 \times d}$ .

**Initialize:** The learnable weights  $W_e^{(l)} \in \mathbb{R}^{10d' \times 10d}$ ;  $W_2^{(l)}, W_3^{(l)} \in \mathbb{R}^{3d' \times 3d}$ ;  $M^{(l)} \in \mathbb{R}^{16 \times 16}$ .

1. Project  $h^{(l)}$  to the isotypic component:  $z^{(l)} = B^\top h^{(l)}$ ;
2. Perform block-wise linear transformation:
  - $z_e = W_e$  flatten( $z_{[:, :10]}^{(l)}$ )
  - $z_2 = W_2$  flatten( $z_{[:, 10:13]}^{(l)}$ )
  - $z_3 = W_3$  flatten( $z_{[:, 13:]}^{(l)}$ )
  - $z^{(l+1)} = \text{concat}[z_e; z_2; z_3] \in \mathbb{R}^{16 \times d'}$
3. Project back to the standard basis:  $\bar{h}^{(l+1)} = B z^{(l+1)}$ .
4. Perform pointwise nonlinearity:  $h^{(l+1)} = \sigma(\bar{h}^{(l+1)})$ .

**return**  $h^{(l+1)}$

---

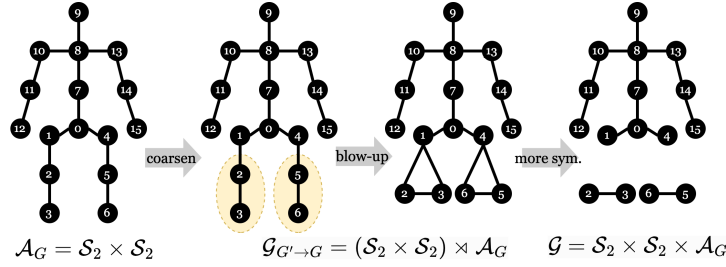

Figure 3: Human skeleton graph  $G$ , its coarsened graph  $G'$  (clustering leg joints), and blow-up of  $G'$

## 689 C Proofs of Our Theoretical Results

### 690 C.1 Proofs of Generalization with Exact Symmetries

**Lemma 1** (Risk Gap). Let  $\mathcal{X} = \mathbb{R}^{N \times d}, \mathcal{Y} = \mathbb{R}^{N \times k}$  be the input and output graph signal spaces on a fixed graph  $G$ . Let  $X \sim \mu$  where  $\mu$  is a  $\mathcal{S}_N$ -invariant distribution on  $\mathcal{X}$ . Let  $Y = f^*(X) + \xi$ , where  $\xi \in \mathbb{R}^{N \times k}$  is random, independent of  $X$  with zero mean and finite variance and  $f^* : \mathcal{X} \rightarrow \mathcal{Y}$  is  $\mathcal{A}_G$ -equivariant. Then, for any  $f \in V$  and for any compact group  $\mathcal{G} \subseteq \mathcal{S}_N$ , we can decompose it as

$$f = \bar{f}_{\mathcal{G}} + f_{\mathcal{G}}^\perp,$$

where  $\bar{f}_{\mathcal{G}} = \mathcal{Q}_{\mathcal{G}} f, f_{\mathcal{G}}^\perp = f - \bar{f}_{\mathcal{G}}$ . Moreover, the risk gap satisfies

$$\Delta(f, \bar{f}_{\mathcal{G}}) := \mathbb{E} [\|Y - f(X)\|_F^2] - \mathbb{E} [\|Y - \bar{f}_{\mathcal{G}}(X)\|_F^2] = \underbrace{-2\langle f^*, f_{\mathcal{G}}^\perp \rangle_\mu}_{\text{mismatch}} + \underbrace{\|f_{\mathcal{G}}^\perp\|_\mu^2}_{\text{constraint}}.$$

691 Lemma 1 is a straightforward extension of Lemma 6 in [8], which makes use of Lemma 1 in [8].

**Lemma 1 in [8].** Let  $U$  be any subspace of  $V$  that is closed under  $\mathcal{Q}$ . Define the subspaces  $S$  and  $A$  of, respectively, the  $\mathcal{G}$ -symmetric and  $\mathcal{G}$ -anti-symmetric functions in  $U : S = \{f \in U : f \text{ is } \mathcal{G}\text{-equivariant}\}$  and  $A = \{f \in U : \mathcal{Q}f = 0\}$ . Then  $U$  admits an orthogonal decomposition into symmetric and anti-symmetric parts

$$U = S \oplus A$$

692 *Proof.* The first part of Lemma 1  $f = \bar{f}_{\mathcal{G}} + f_{\mathcal{G}}^{\perp}$  follows from Lemma 1 in [8]. For the second part,  
 693 by the assumption that the noise  $\xi$  is independent of  $X$  with zero mean and finite variance, we can  
 694 simplify the risk gap as

$$\begin{aligned} \Delta(f, \bar{f}_{\mathcal{G}}) &:= \mathbb{E} [\|Y - f(X)\|_F^2] - \mathbb{E} [\|Y - \bar{f}_{\mathcal{G}}(X)\|_F^2] \\ &= \mathbb{E} [\|f^*(X) - f(X)\|_F^2] - \mathbb{E} [\|f^*(X) - \bar{f}_{\mathcal{G}}(X)\|_F^2]. \end{aligned} \quad (26)$$

695 Substituting  $f = \bar{f}_{\mathcal{G}} + f_{\mathcal{G}}^{\perp}$  yields

$$\begin{aligned} &\mathbb{E} [\|f^*(X) - \bar{f}_{\mathcal{G}}(X) - f_{\mathcal{G}}^{\perp}(X)\|_F^2] - \mathbb{E} [\|f^*(X) - \bar{f}_{\mathcal{G}}(X)\|_F^2] \\ &= -2\langle f^*(X) - \bar{f}_{\mathcal{G}}(X), f_{\mathcal{G}}^{\perp}(X) \rangle_{\mu} + \mathbb{E} [\|f_{\mathcal{G}}^{\perp}(X)\|_F^2] \\ &= -2\langle f^*, f_{\mathcal{G}}^{\perp} \rangle_{\mu} + \|f_{\mathcal{G}}^{\perp}\|_{\mu}^2. \end{aligned} \quad (27)$$

696 □

697 We remark that Lemma 6 in [8] assumes that  $f^*$  is  $\mathcal{G}$ -equivariant, so the first term in (27) vanishes.  
 698 We are motivated from the symmetry model selection problem, and thereby relax the assumption of  
 699 the chosen symmetry group  $\mathcal{G}$  can differ from the target symmetry group  $\mathcal{A}_{\mathcal{G}}$ .

**Theorem 2** (Bias-Variance-Tradeoff). Let  $\mathcal{X} = \mathbb{R}^{N \times d}$ ,  $\mathcal{Y} = \mathbb{R}^{N \times k}$  be the graph signals spaces on a fixed graph  $G$ . Let  $\mathcal{G} \subseteq \mathcal{S}_N$  with orthogonal representations  $\phi$  on  $\mathcal{X}$  and  $\psi$  on  $\mathcal{Y}$ . Let  $X_{[i,j]} \stackrel{i.i.d.}{\sim} \mathcal{N}(0, \sigma_X^2)$  and  $Y = f^*(X) + \xi$  where  $f^*(x) = \Theta^{\top} x$  is  $\mathcal{A}_{\mathcal{G}}$ -equivariant and  $\Theta \in \mathbb{R}^{N^d \times N^k}$ . Assume  $\xi_{[i,j]}$  is random, independent of  $X$ , with mean 0 and  $\mathbb{E} [\xi \xi^{\top}] = \sigma_{\xi}^2 < \infty$ . Let  $\hat{\Theta}$  be the least-squares estimate of  $\Theta$  from  $n$  i.i.d. examples  $\{(X_i, Y_i) : i = 1, \dots, n\}$ ,  $\Psi_{\mathcal{G}}(\hat{\Theta})$  be its equivariant version with respect to  $\mathcal{G}$ . Let  $(\chi_{\psi} | \chi_{\phi}) = \int_{\mathcal{G}} \chi_{\psi}(g) \chi_{\phi}(g) d\lambda(g)$  denote the scalar product of the characters. If  $n > Nd + 1$  the risk gap is

$$\mathbb{E} \left[ \Delta \left( f_{\hat{\Theta}}, f_{\Psi_{\mathcal{G}}(\hat{\Theta})} \right) \right] = \underbrace{-\sigma_X^2 \|\Psi_{\mathcal{G}}^{\perp}(\Theta)\|_F^2}_{\text{bias}} + \underbrace{\sigma_{\xi}^2 \frac{N^2 dk - (\chi_{\psi} | \chi_{\phi})}{n - Nd - 1}}_{\text{variance}}.$$

700 Theorem 2 presents the risk gap in expectation, which follows from Lemma 1, by taking  $f$  as  
 701 the least-squares estimator and using assumptions in the linear regression setting. To this end, we  
 702 denote  $\mathbf{X} \in \mathbb{R}^{n \times Nd}$ ,  $\mathbf{Y} \in \mathbb{R}^{n \times Nk}$ ,  $\boldsymbol{\xi} \in \mathbb{R}^{n \times Nk}$  as the training data arranged in matrix form, where  
 703  $\mathbf{Y} = f^*(\mathbf{X}) + \boldsymbol{\xi}$ . Recall that the least-squares estimator of  $\Theta$  in the classic regime ( $n > d$ ) is given  
 704 by

$$\hat{\Theta} := (\mathbf{X}^{\top} \mathbf{X})^{\dagger} \mathbf{X}^{\top} \mathbf{Y} \stackrel{a.e.}{=} \Theta + (\mathbf{X}^{\top} \mathbf{X})^{-1} \mathbf{X}^{\top} \boldsymbol{\xi}, \quad (28)$$

705 while its equivariant map is

$$\Psi_{\mathcal{G}}(\hat{\Theta}) = \int_{\mathcal{G}} \phi(g) \hat{\Theta} \psi(g^{-1}) d\lambda(g). \quad (29)$$

706 Our proof makes use of the following results in [8], which we restate adapted versions here for our  
 707 setting.

708 **Proposition 11 in [8].** Let  $V = \{f_W : f_W(x) = W^{\top} x, W \in \mathbb{R}^{d \times k}, x \in \mathbb{R}^d\}$  denote the space of  
 709 linear functions. Let  $X \sim \mu$  with  $\mathbb{E}[X X^{\top}] = \Sigma$ . For any linear functions  $f_{W_1}, f_{W_2} \in V$ , the inner  
 710 product on  $V$  satisfies

$$\langle f_{W_1}, f_{W_2} \rangle_{\mu} = \text{Tr}(W_1^{\top} \Sigma W_2). \quad (30)$$

**Theorem 13 in [8]** (Simplified, Adapted). Consider the same setting as Theorem 2. For  $n > Nd + 1$ ,

$$\sigma_X^2 \mathbb{E} \left[ \left\| \Psi_{\mathcal{G}}^{\perp} \left( (\mathbf{X}^{\top} \mathbf{X})^{\dagger} \mathbf{X}^{\top} \boldsymbol{\xi} \right) \right\|_F^2 \right] = \sigma_{\xi}^2 \frac{N^2 dk - (\chi_{\psi} | \chi_{\phi})}{n - Nd - 1}.$$

711 *Proof.* We first plug in the least-squares expressions  $\hat{\Theta}, \Psi_{\mathcal{G}}(\hat{\Theta})$  to Lemma 1 and treat the mismatch  
 712 term and constraint term separately; We complete the proof by collecting common terms together.

713 For the mismatch term, our goal is to compute

$$-2 \mathbb{E} [\langle \Theta, \hat{\Theta} - \Psi_{\mathcal{G}}(\hat{\Theta}) \rangle_{\mu}], \quad (31)$$

714 where the expectation is taken over the test point  $X$  and the training data  $\mathbf{X}, \xi$ .

715 To that end, we write

$$\left( \hat{\Theta} - \Psi_{\mathcal{G}}(\hat{\Theta}) \right) x \stackrel{a.e.}{=} \Theta^{\top} x + \xi^{\top} \mathbf{X} (\mathbf{X}^{\top} \mathbf{X})^{-1} x - \int_{\mathcal{G}} \psi(g^{-1}) (\Theta^{\top} + \xi^{\top} \mathbf{X} (\mathbf{X}^{\top} \mathbf{X})^{-1}) \phi(g) x \, d\lambda(g). \quad (32)$$

716 Taking expectation yields

$$\begin{aligned} \mathbb{E}_{X, \mathbf{X}, \xi} [\langle \Theta, \hat{\Theta} - \Psi_{\mathcal{G}}(\hat{\Theta}) \rangle_{\mu}] &= \|\Theta\|_{\mu}^2 + \mathbb{E}_{X, \mathbf{X}, \xi} [\langle \Theta^{\top} \mathbf{X}, \xi^{\top} \mathbf{X} (\mathbf{X}^{\top} \mathbf{X})^{-1} x \rangle] \\ &\quad - \mathbb{E}_{X, \mathbf{X}, \xi} \left[ \langle \Theta^{\top} x, \int_{\mathcal{G}} \psi(g^{-1}) (\Theta^{\top} + \xi^{\top} \mathbf{X} (\mathbf{X}^{\top} \mathbf{X})^{-1}) \phi(g) x \, d\lambda(g) \rangle \right]. \end{aligned} \quad (33)$$

717 Note that  $\xi$  is independent with  $\mathbf{X}$  and mean 0, so the second term in (33) vanishes. Similarly, the  
718 part  $\mathbb{E}_{X, \mathbf{X}, \xi} \int_{\mathcal{G}} \psi(g^{-1}) (\xi^{\top} \mathbf{X} (\mathbf{X}^{\top} \mathbf{X})^{-1}) \phi(g) x \, d\lambda(g)$  also vanishes (by first taking conditional  
719 expectation of  $\xi$  conditioned on  $\mathbf{X}$ ). Thus, we arrive at

$$\begin{aligned} \mathbb{E} [\langle \Theta, \hat{\Theta} - \Psi_{\mathcal{G}}(\hat{\Theta}) \rangle_{\mu}] &= \|\Theta\|_{\mu}^2 - \mathbb{E}_x \left[ \langle \Theta^{\top} x, \int_{\mathcal{G}} \psi(g^{-1}) \Theta^{\top} \phi(g) x \, d\lambda(g) \rangle \right] \\ &= \|\Theta\|_{\mu}^2 - \langle \Theta, \Psi_{\mathcal{G}}(\Theta) \rangle_{\mu} \\ &= \|\Psi_{\mathcal{G}}^{\perp}(\Theta)\|_{\mu}^2 \\ &= -2 \sigma_X^2 \|\Psi_{\mathcal{G}}^{\perp}(\Theta)\|_F^2, \end{aligned} \quad (34)$$

720 where the last equality follows from Proposition 11 in [8] with the assumption that  $\Sigma = \sigma_X^2$ . This  
721 finishes the computation for the mismatch term.

722 Now for the constraint term, we have

$$\|f_{\mathcal{G}}^{\perp}\|_{\mu}^2 = \|\Psi_{\mathcal{G}}^{\perp}(\hat{\Theta})\|_{\mu}^2 \quad (35)$$

$$= \sigma_X^2 \mathbb{E}_{\mathbf{X}, \xi} \|\Psi_{\mathcal{G}}^{\perp}(\Theta + (\mathbf{X}^{\top} \mathbf{X})^{-1} \mathbf{X}^{\top} \xi)\|^2 \quad (36)$$

$$= \sigma_X^2 \|\Psi_{\mathcal{G}}^{\perp}(\Theta)\|_F^2 + \sigma_X^2 \mathbb{E}_{\mathbf{X}, \xi} \|\Psi_{\mathcal{G}}^{\perp}((\mathbf{X}^{\top} \mathbf{X})^{-1} \mathbf{X}^{\top} \xi)\|^2, \quad (37)$$

723 where the last equality follows from linearity of expectation,  $\mathbb{E}[\xi] = 0$  and  $\xi$  independent of  $x$ .

724 Combining the mismatch term in (34) with the constraint term in (37), the risk gap becomes

$$\mathbb{E} \left[ \Delta \left( f_{\hat{\Theta}}, f_{\Psi_{\mathcal{G}}(\hat{\Theta})} \right) \right] = -\sigma_X^2 \|\Psi_{\mathcal{G}_L}^{\perp}(\Theta)\|^2 + \sigma_X^2 \mathbb{E}_{\mathbf{X}, \xi} \|\Psi_{\mathcal{G}_L}^{\perp}((\mathbf{X}^{\top} \mathbf{X})^{-1} \mathbf{X}^{\top} \xi)\|^2, \quad (38)$$

725 Applying Theorem 13 in [8], the second term in (38) reduces to

$$\sigma_X^2 \mathbb{E}_{\mathbf{X}, \xi} \|\Psi_{\mathcal{G}_L}^{\perp}((\mathbf{X}^{\top} \mathbf{X})^{-1} \mathbf{X}^{\top} \xi)\|^2 = \sigma_{\xi}^2 \frac{N^2 dk - (\chi_{\psi} | \chi_{\phi})}{n - Nd - 1}, \quad (39)$$

726 from which the theorem follows immediately.

727 □

728 Finally, we state a well-known result for the risk of (Ordinary) Least-Squares Estimator<sup>2</sup> (see [70, 71]  
729 and references therein).

**Lemma 6** (Risk of Least-Squares Estimator). Consider the same set-up as Theorem 2. For  $n > Nd + 1$ ,

$$\mathbb{E} \left[ \|Y - \hat{\Theta}^{\top} X\|_F^2 \right] = \sigma_{\xi}^2 \frac{Nd}{n - Nd - 1} + \sigma_{\xi}^2.$$

<sup>2</sup>In the main paper, the irreducible error term  $\sigma_{\xi}^2$  is missing. We fix this in the Appendix and the revised version. The risk gain is of a factor  $\frac{N^2 dk - (\chi_{\psi} | \chi_{\phi})}{n - 1}$ .



730 *Proof.* Recall  $X, Y$  denote the test sample. We denote the risk of the least-squares estimator *con-*  
731 *ditional on the training data*  $\mathbf{X} \in \mathbb{R}^{n \times Nd}$  as  $\mathcal{R}(\hat{\Theta} \mid \mathbf{X})$ , which has the following bias-variance  
732 decomposition:

$$\mathcal{R}(\hat{\Theta} \mid \mathbf{X}) = \mathbb{E} \left[ \|Y - \hat{\Theta}^\top X\|_F^2 \mid \mathbf{X} \right] \quad (40)$$

$$= \mathbb{E} \left[ \|\Theta^\top X + \xi - \hat{\Theta}^\top X\|_F^2 \mid \mathbf{X} \right] \quad (41)$$

$$= \mathbb{E} \left[ \|(\Theta - \hat{\Theta})^\top X\|_F^2 \mid \mathbf{X} \right] + \sigma_\xi^2, \quad (42)$$

733 where the last equality follows from  $\xi$  being zero mean and independent with  $X$ . The second term  $\sigma_\xi^2$   
734 is also known as *irreducible error*. We decompose the first term into

$$\mathbb{E} \left[ \|(\Theta - \hat{\Theta})^\top X\|_F^2 \mid \mathbf{X} \right] = \mathbb{E} \left[ \|(\Theta - \mathbb{E}[\hat{\Theta}])^\top X\|_F^2 + \|(\mathbb{E}[\hat{\Theta}] - \hat{\Theta})^\top X\|_F^2 \mid \mathbf{X} \right]. \quad (43)$$

735 Recall that  $\hat{\Theta} \stackrel{a.e.}{=} (\mathbf{X}^\top \mathbf{X})^{-1} \mathbf{X}^\top Y = (\mathbf{X}^\top \mathbf{X})^{-1} \mathbf{X}^\top (\mathbf{X}\Theta + \xi) = \Theta + (\mathbf{X}^\top \mathbf{X})^{-1} \mathbf{X}^\top \xi$ . Thus  
736  $\mathbb{E}[\hat{\Theta}] = \Theta$  and (43) simplifies to  $\mathbb{E} \left[ \|(\mathbb{E}[\hat{\Theta}] - \hat{\Theta})^\top X\|_F^2 \mid \mathbf{X} \right]$ .

737 We finish computing the risk by taking expectation over  $\mathbf{X}$ , and using  $\mathbb{E}[\hat{\Theta}] - \hat{\Theta} = (\mathbf{X}^\top \mathbf{X})^{-1} \mathbf{X}^\top \xi$ ,

$$\mathbb{E} \left[ \|Y - \hat{\Theta}^\top X\|_F^2 \right] = \mathbb{E} \left[ \mathcal{R}(\hat{\Theta} \mid \mathbf{X}) \right] \quad (44)$$

$$= \mathbb{E}_{\mathbf{X}} \left[ \mathbb{E}_{X, \xi} \left[ \|(\mathbb{E}[\hat{\Theta}] - \hat{\Theta})^\top X\|_F^2 \mid \mathbf{X} \right] \right] + \sigma_\xi^2 \quad (45)$$

$$= \mathbb{E} \left[ \|((\mathbf{X}^\top \mathbf{X})^{-1} \mathbf{X}^\top \xi)^\top X\|_F^2 \right] + \sigma_\xi^2 \quad (46)$$

$$= \sigma_\xi^2 \text{tr} \left( \mathbb{E}[(\mathbf{X}^\top \mathbf{X})^{-1}] \sigma_X^2 I \right) + \sigma_\xi^2. \quad (47)$$

738 By [72, Lemma 2.3], for  $n > Nd + 1$ ,  $\mathbb{E}[(\mathbf{X}^\top \mathbf{X})^{-1}] = \frac{Nd}{n - Nd - 1} I$ . Putting this in (47) completes  
739 the proof.  $\square$

## 740 C.2 Proofs of Generalization with Approximate Symmetries

741 **Corollary 3** (Risk Gap via Graph Coarsening). Let  $\mathcal{X} = \mathbb{R}^{N \times d}$ ,  $\mathcal{Y} = \mathbb{R}^{N \times k}$  be the input and output  
742 graph signal spaces on a fixed graph  $G$ . Let  $X \sim \mu$  where  $\mu$  is a  $\mathcal{S}_N$ -invariant distribution on  $\mathcal{X}$ . Let  
743  $Y = f^*(X) + \xi$ , where  $\xi \in \mathbb{R}^{N \times k}$  is random, independent of  $X$  with zero mean and finite variance,  
744 and  $f^* : \mathbb{R}^{N \times d} \rightarrow \mathbb{R}^{N \times k}$  be an approximately equivariant mapping with equivariance rate  $\kappa$ . Then,  
745 for any  $G'$  that coarsen  $G$  up to error  $\epsilon$ , for any  $f \in V$ , we have

$$\Delta(f, \bar{f}_{\mathcal{G}_{G \rightarrow G'}}) = \underbrace{-2\langle f^*, f_{\mathcal{G}_{G \rightarrow G'}}^\perp \rangle_\mu}_{\text{mismatch}} + \underbrace{\|f_{\mathcal{G}_{G \rightarrow G'}}^\perp\|_\mu^2}_{\text{constraint}} \geq (1 - 2\kappa(\epsilon)) \|f_{\mathcal{G}_{G \rightarrow G'}}^\perp\|_\mu^2.$$

746 *Proof.* We start by simplifying the mismatch term in Lemma [1]

$$\begin{aligned} -2\mathbb{E} \left[ \langle f^*(x), f_{\mathcal{G}_{G \rightarrow G'}}^\perp(x) \rangle \right] &= -2\mathbb{E} \left[ \langle f^*(x) - f_{\mathcal{G}_{G \rightarrow G'}}^*(x) + f_{\mathcal{G}_{G \rightarrow G'}}^*(x), f_{\mathcal{G}_{G \rightarrow G'}}^\perp(x) \rangle \right] \\ &= -2\mathbb{E} \left[ \left\langle \underbrace{f^*(x) - f_{\mathcal{G}_{G \rightarrow G'}}^*(x)}_{\mathcal{G}_L\text{-anti-symmetric part of } f^*}, \underbrace{f_{\mathcal{G}_{G \rightarrow G'}}^\perp(x)}_{\mathcal{G}_L\text{-anti-symmetric part of } f} \right\rangle \right] \\ &\geq -2 \|f^* - f_{\mathcal{G}_{G \rightarrow G'}}^*\|_\mu \|f_{\mathcal{G}_{G \rightarrow G'}}^\perp\|_\mu \quad (\text{By Cauchy Schwarz Ineq.}) \\ &\geq -2\kappa(\epsilon) \|f_{\mathcal{G}}^\perp\|_\mu. \quad (\text{By Definition [4] Approx. Equiv. Map}) \end{aligned}$$

747 Putting this together with the constraint term completes the proof.  $\square$

**Corollary 4** (Bias-Variance-Tradeoff via Graph Coarsening). Consider the same linear regression setting in Theorem 2, except now  $f^*$  is an approximately equivariant mapping with equivariance rate  $\kappa$ , and  $\mathcal{G} = \mathcal{G}_{G \rightarrow G'}$  is controlled by  $G'$  that coarsens  $G$  up to error  $\epsilon$ . Denote the orthogonal representations of  $\mathcal{G}_{G \rightarrow G'}$  on  $\mathcal{X}, \mathcal{Y}$  as  $\phi', \psi'$ , respectively. Let  $(\chi_{\psi'} | \chi_{\phi'}) = \int_{\mathcal{G}_{G \rightarrow G'}} \chi_{\psi'}(g) \chi_{\phi'}(g) d\lambda(g)$  denote the scalar product of the characters. If  $n > Nd + 1$  the risk gap is bounded by

$$\mathbb{E} \left[ \Delta \left( f_{\hat{\Theta}}, f_{\Psi_{\mathcal{G}_{G \rightarrow G'}}(\hat{\Theta})} \right) \right] \geq (1 - 2\kappa(\epsilon)) \sigma_{\xi}^2 \frac{N^2 dk - (\chi_{\psi'} | \chi_{\phi'})}{n - Nd - 1}.$$

748 *Proof.* It follows immediately from applying Theorem 13 in [8] to Corollary 3 with  $\mathcal{G} = \mathcal{G}_{G \rightarrow G'}$ .  $\square$

## 749 D Example Details

### 750 D.1 Example 3.1

751 Consider  $\mathcal{G} = \mathcal{S}_3, \mathcal{G} = \mathcal{S}_2, \mathcal{X} = \mathbb{R}^3, \mathcal{Y} = \mathbb{R}^3$ , and  $x \sim \mathcal{N}(0, \sigma_X^2 I_d)$ . The target function is linear,  
752 i.e.,  $f^*(x) = \Theta^\top x$  for some  $\Theta \in \mathbb{R}^{3 \times 3}$ . In other words, we are learning linear functions on a fixed  
753 graph domain with 3 nodes. Suppose the target function is  $\mathcal{S}_2$ -equivariant such that it has the form

$$\Theta = \begin{bmatrix} a & b & c \\ b & a & c \\ d & d & e \end{bmatrix}, \quad a, b, c, d, e \in \mathbb{R}. \quad (48)$$

754 Now, we project  $\Theta$  in (48) to  $\mathcal{S}_3$ -equivariant space using the intertwine average [5] with the orthogonal  
755 representation of  $\mathcal{S}_3$ . Direct calculation yields

$$\Psi_{\mathcal{S}_3}(\Theta) = \begin{bmatrix} \frac{1}{3}(2a + e) & \frac{1}{3}(b + c + d) & \frac{1}{3}(b + c + d) \\ \frac{1}{3}(b + c + d) & \frac{1}{3}(2a + e) & \frac{1}{3}(b + c + d) \\ \frac{1}{3}(b + c + d) & \frac{1}{3}(b + c + d) & \frac{1}{3}(2a + e) \end{bmatrix} \quad (49)$$

$$\Psi_{\mathcal{S}_3}^\perp(\Theta) = \Theta - \Psi_{\mathcal{S}_3}(\Theta) = \begin{bmatrix} \frac{1}{3}(a - e) & \frac{1}{3}(2b - c - d) & \frac{1}{3}(-b + 2c - d) \\ \frac{1}{3}(2b - c - d) & \frac{1}{3}(a - e) & \frac{1}{3}(-b + 2c - d) \\ \frac{1}{3}(-b - c + 2d) & \frac{1}{3}(-b - c + 2d) & \frac{1}{3}(-2a + 2e). \end{bmatrix} \quad (50)$$

756 Therefore, the bias term evaluates to

$$-\sigma_X^2 \|\Psi_{\mathcal{S}_3}^\perp(\Theta)\|^2 = -\sigma_X^2 \left( \frac{2(a - e)^2}{3} + \frac{2(-2b + c + d)^2}{9} + \frac{2(b - 2c + d)^2}{9} + \frac{2(b + c - 2d)^2}{9} \right). \quad (51)$$

757 For the variance term, recall  $\chi_{\psi_{\mathcal{S}_3}}, \psi_{\mathcal{S}_3}$  are both the standard representation of  $\mathcal{S}_3$ , we have

$$(\chi_{\psi_{\mathcal{S}_3}} | \chi_{\phi_{\mathcal{S}_3}}) = \frac{1}{6}(3^2 + 1^2 + 1^2 + 1^2 + 0^2 + 0^2) = 2. \quad (52)$$

758 Therefore, the variance term evaluates to

$$\sigma_{\xi}^2 \frac{N^2 - (\chi_{\psi} | \chi_{\psi})}{n - N - 1} = \sigma_{\xi}^2 \frac{7}{n - 4}. \quad (53)$$

759 Putting (51) and (53) together yields the generalization gap of for the least square estimator  $f_{\hat{\Theta}}$   
760 compared to its  $\mathcal{S}_3$ -equivariant version  $f_{\Psi_{\mathcal{S}_3}(\hat{\Theta})}$ .

761 As a comparison, when choosing the symmetry group of the target function  $\mathcal{G} = \mathcal{S}_2$ , the bias vanishes  
762 and note that  $(\chi_{\psi_{\mathcal{S}_2}} | \chi_{\phi_{\mathcal{S}_2}}) = \frac{1}{2}(3^2 + 1^2) = 5$ , so generalization gap is

$$\mathbb{E} \left[ \Delta \left( f_{\hat{\Theta}}, f_{\Psi_{\mathcal{S}_2}(\hat{\Theta})} \right) \right] = \sigma_{\xi}^2 \frac{4}{n - 4}. \quad (54)$$

763 We see that choosing  $\mathcal{G} = \mathcal{S}_3$  is better if  $a \approx e, b \approx c \approx d$  (i.e.,  $f^*$  is approximately  $\mathcal{S}_3$ -invariant)  
764 and the training sample size  $n$  small, whereas  $\mathcal{S}_2$  is better vice versa. This analysis illustrates the  
765 advantage of choosing a (suitably) larger symmetry group to induce a smaller hypothesis class  
766 when learning with limited data, and introduce useful inductive bias when the target function is  
767 approximately symmetric with respect to a larger group. We further validate our theoretical analysis  
768 via simulation, with details and results shown in Figure 4

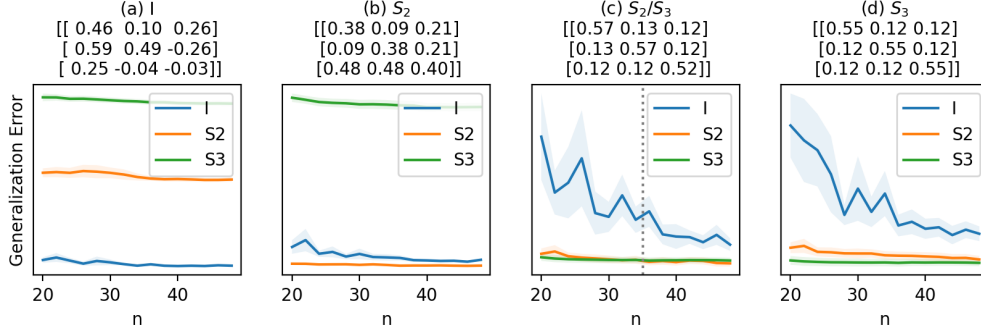

Figure 4: Choosing the symmetry group corresponding to the target function usually yields the best generalization ((a), (b), (d)), but not always: when the number of training data  $n$  is small and the target function  $f$  is approximately equivariant with respect to a larger group, choosing the larger symmetry group could yield further generalization gain, as shown in (c) empirically. Dashed gray vertical line highlights the theoretical threshold  $n^* \approx 35$ , before which using  $\mathcal{S}_3$  yields better generalization than  $\mathcal{S}_2$ , validating our theoretical analysis. We set  $\sigma_X^2 = 1, \sigma_\xi^2 = \frac{1}{64}$ , conduct 10 random runs and compute the generalization error based on 300 test points. We obtain the estimators via stochastic gradient descent, and enforce symmetry via tying weights. Titles of each subplot indicate the symmetry of the target function, and display the target function values.

## 769 D.2 Example: Approximately Equivariant Mapping on a Geometric Graph

770 In this section, we illustrate a construction of an approximately equivariant mapping. We focus on a  
 771 version of Definition 3 that does not take to account the symmetries of  $G'$ . Namely, we consider a  
 772 definition of the approximate symmetries as

$$\mathcal{G}_{G \rightarrow G'} := \mathcal{S}_{c_1} \times \mathcal{S}_{c_2} \dots \times \mathcal{S}_{c_M} \subset \mathcal{S}_N.$$

773 Equivalently, we restrict the analysis to coarsening graphs  $G'$  that are asymmetric.

774 **Background from graphon-signal analysis.** To support our construction, we cite some definitions  
 775 and results from [73].

776 **Definition 8.** Let  $r > 0$ . The graphon-signal space with signals bounded by  $r$  is  $\mathcal{WL}_r := \mathcal{W} \times$   
 777  $L_r^\infty[0, 1]$ , where  $L_r^\infty[0, 1]$  is the ball of radius  $r$  in  $L^\infty[0, 1]$ . The distance in  $\mathcal{WL}_r$  is defined for  
 778  $(W, s), (V, g) \in \mathcal{WL}_r$  by

$$d_\square((W, s), (V, g)) := \|(W, s) - (V, g)\|_\square := \|W - V\|_\square + \|s - g\|_1.$$

779 Moreover,

$$\delta_\square((W, s), (V, g)) = \inf_\phi d_\square((W, s), (V^\phi, g^\phi)),$$

780 where  $g^\phi(x) = g(\phi(x))$  and  $\phi$  is a measure preserving bijection.

781 Any graph-signal induces a graphon signal in the natural way, as in Definition 1. The cut norm and  
 782 distance between to graph-signals is defined to be the cut norm and distance between the two induced  
 783 graphon-signal respectively. Similarly, the  $L_1$  distance between a signal  $q$  on a graph and a signal  $s$   
 784 on  $[0, 1]$  is defined to be the  $L_1$  distance between the induced signal from  $q$  and  $s$ .

785 The supremum in the definition of cut distance between two induced graphon-signals is realized for  
 786 some measure preserving bijection.

787 **Sampling graphon-signals.** The following construction is from [73, Section 3.4]. Let  $\Lambda =$   
 788  $(\lambda_1, \dots, \lambda_N) \in [0, 1]^N$  be  $N$  independent uniform random samples from  $[0, 1]$ , and  $(W, s) \in \mathcal{WL}_r$ .  
 789 We define the *random weighted graph*  $W(\Lambda)$  as the weighted graph with  $N$  nodes and edge weight  
 790  $w_{i,j} = W(\lambda_i, \lambda_j)$  between node  $i$  and node  $j$ . We similarly define the *random sampled signal*  $s(\Lambda)$   
 791 with value  $s_i = s(\lambda_i)$  at each node  $i$ . Note that  $W(\Lambda)$  and  $s(\Lambda)$  share the sample points  $\Lambda$ . We then  
 792 define a random simple graph as follows. We treat each  $w_{i,j} = W(\lambda_i, \lambda_j)$  as the parameter of a

793 Bernoulli variable  $e_{i,j}$ , where  $\mathbb{P}(e_{i,j} = 1) = w_{i,j}$  and  $\mathbb{P}(e_{i,j} = 0) = 1 - w_{i,j}$ . We define the *random*  
 794 *simple graph*  $\mathbb{G}(W, \Lambda)$  as the simple graph with an edge between each node  $i$  and node  $j$  if and only  
 795 if  $e_{i,j} = 1$ .

796 The following theorem is from [73] Theorem 3.6]

797 **Theorem 1** (Sampling lemma for graphon-signals). *Let  $r > 1$ . There exists a constant  $N_0 > 0$  that*  
 798 *depends on  $r$ , such that for every  $N \geq N_0$ , every  $(W, s) \in \mathcal{WL}_r$ , and for  $\Lambda = (\lambda_1, \dots, \lambda_N) \in [0, 1]^N$*   
 799 *independent uniform random samples from  $[0, 1]$ , we have*

$$\mathbb{E} \left( \delta_{\square} \left( (W, s), (\mathbb{G}(W, \Lambda), s(\Lambda)) \right) \right) < \frac{15}{\sqrt{\log(N)}}. \quad (55)$$

800 By Markov's inequality and (55), for any  $0 < p < 1$ , there is an event of probability  $1 - p$  (regarding  
 801 the choice of  $\Lambda$ ) in which

$$\delta_{\square} \left( (W, s), (\mathbb{G}(W, \Lambda), s(\Lambda)) \right) < \frac{15}{p\sqrt{\log(N)}}. \quad (56)$$

802 **Stability to deformations of mappings on geometric graphs.** Let  $\mathcal{M}$  be a metric space with an  
 803 atomless standard probability measure defined over the Borel sets (up to completion of the measure).  
 804 Such a probability space is equivalent to the standard probability space  $[0, 1]$  with Lebesgue measure.  
 805 Namely, there are co-null sets  $A \subset \mathcal{M}$  and  $B \subset [0, 1]$ , and a measure preserving bijection  $\phi : A \rightarrow B$ .  
 806 Hence, graphon analysis applied as-is when replacing the domain  $[0, 1]$  with  $\mathcal{M}$ .

807 Suppose that we are interested in a target function  $f_{\mathcal{M}} : L^1(\mathcal{M}) \rightarrow L^1(\mathcal{M})$  that is stable to  
 808 deformations in the following sense.

809 **Definition 9.** *Let  $\epsilon > 0$ . A measurable bijection  $\nu : \mathcal{M} \rightarrow \mathcal{M}$  is called a deformation up to  $\epsilon$ , if*  
 810 *there exists an event  $B_{\epsilon} \subset \mathcal{M}$  with probability greater than  $1 - \epsilon$  such that for every  $x \in B_{\epsilon}$*

$$d_{\mathcal{M}}(\nu(x), x) < \epsilon.$$

811 *The mapping  $f_{\mathcal{M}} : L^2(\mathcal{M}) \rightarrow L^2(\mathcal{M})$  is called stable to deformations with stability constant  $C$ , if*  
 812 *for any deformation  $\nu$  up to  $\epsilon$ , and every  $s \in L^1(\mathcal{M})$ , we have*

$$\|f_{\mathcal{M}}(s) - f_{\mathcal{M}}(s \circ \nu) \circ \nu^{-1}\|_1 < C\epsilon.$$

813 Suppose that we observe a discretized version of the domain  $\mathcal{M}$ , defined as follows. There is a  
 814 graphon  $W : \mathcal{M}^2 \rightarrow [0, 1]$  defined as

$$W(x, y) = r(d(x, y)), \quad (57)$$

815 where  $r : \mathbb{R}_+ \rightarrow [0, 1]$  is a decreasing function with support  $[0, \rho]$ . Instead of observing  $W$ , we  
 816 observe a weighted graph  $G = \mathbb{G}(W, \Lambda)$  with node set  $[N]$ , sampled from  $W$  on the random  
 817 independent points  $\Lambda = \{\lambda_n\}_{n=1}^N \subset \mathcal{M}$  as above. Suppose moreover that any graph signal is  
 818 sampled from a signal in  $L^1(\mathcal{M})$ , on the same random points  $\Lambda$ , as above.

819 Suppose that the target  $f_{\mathcal{M}}$  on the continuous domain is well approximated by some mapping  
 820  $f^* : L^2[N] \rightarrow L^2[N]$  on the discrete domain in the following sense. For every  $s \in L^1(\mathcal{M})$ , let  $s_G$   
 821 be the graph signal sampled on the random samples  $\{\lambda_n\}_n$ . Then there is an event of high probability  
 822 such that

$$\|f^* s_G - \{(f_{\mathcal{M}}(s))(x_n)\}_n\|_1 < e$$

823 for some small  $e$ . We hence consider  $f^*$  as the target mapping of the learning problem. One example  
 824 of such a scenario is when there exists some Lipschitz continuous mapping  $\Theta : \mathcal{WL}_r \rightarrow \mathcal{WL}_r$  with  
 825 Lipschitz constant  $L$ , such that  $f_{\mathcal{M}} = \Theta(W, \cdot)$  and  $f^* = \Theta(G, \cdot)$ . Indeed, by (56), for some  $p$  as  
 826 small as we like, there is an event of probability  $1 - p$  in which, up to a measure preserving bijection,

$$\begin{aligned} \|f_{\mathcal{M}} s - f^* s_G\|_1 &\leq \delta_{\square} \left( (W, f_{\mathcal{M}} s), (G, f^* s_G) \right) \\ &\leq L \delta_{\square} \left( (W, s), (G, s_G) \right) < \frac{15L}{p\sqrt{\log(N)}} = e. \end{aligned}$$

827

828 A concrete example is when  $\Theta$  is a message passing neural network (MPNN) with Lipschitz continu-  
 829 ous message and update functions, and normalized sum aggregation [73, Theorem 4.1].

830 Let  $G'$  be a graph that coarsens  $G$  up to error  $\epsilon$ . In the same event as above, by (56), up to a measure  
 831 preserving bijection,

$$d_{\square}(W_{G'}, W) \leq d_{\square}(W_{G'}, W_G) + d_{\square}(W_G, W) \leq \epsilon + e = u. \quad (58)$$

832 We next show an approximation property that we state here informally: since  $W(x, y) \approx 0$  for  $x$  away  
 833 from  $y$ , we must have  $W_{G'}(x, y) \approx 0$  as well for a set of high measure. Otherwise,  $\delta_{\square}(W_{G'}, W)$   
 834 cannot be small. By this, any approximate symmetry of  $G$  is a small deformation, and, hence,  $f^*$  is  
 835 an approximately equivariant mapping.

836 **Equivariant mappings on geometric graphs.** In the following, we construct a scenario in which  
 837  $f^*$  can be shown to be approximately equivariant in a restricted sense. For simplicity, we restrict  
 838 to the case  $r = \mathbb{1}_{[0, \rho]}$  in the geometric graphon  $W$  of (57). Denote the induced graphon  $W_{G'} = T$ .  
 839 Given  $h > 0$ , define the  $h$ -diagonal

$$d_h = \{(x, y) \in \mathcal{M}^2 \mid d_{\mathcal{M}}(x, y) \leq h\}.$$

840 In the following, all distances are assumed to be up to the best measure preserving bijection.

841 If there is a domain  $S' \times T' \in \mathcal{M}^2$  outside the  $\rho$ -diagonal in which  $T(x, y) > c$  for some  $c > 0$ , we  
 842 must have

$$\|W - T\|_{\square} \geq \int_{S'} \int_{T'} T(x, y) dy dx = c\mu(S')\mu(T').$$

843 Hence, since by (58),  $\|W - T\|_{\square} < u$ , for every  $S' \times T'$  that does not intersect  $d_{\rho}$ , we must have

$$\int_{S'} \int_{T'} T(x, y) dy dx \leq u.$$

844 In other words, for any two sets  $S, T$  with distance more than  $\rho$  ( $\inf_{s \in S, t \in T} d_{\mu}(s, t) > \rho$ ), we have

$$\int_S \int_T T(x, y) dy dx \leq u.$$

845 This formalizes the statement “ $W(x, y) \approx 0$  for  $x$  away from  $y$ ” from above.

846 Next, we develop the analysis for the special case  $\mathcal{M} = [0, 1]$  with the standard metric and Lebesgue  
 847 probability measure. We note that the analysis can be extended to  $\mathcal{M} = [0, 1]^D$  for a general  
 848 dimension  $D \in \mathbb{N}$ .

849 For every  $z \in [0, 1]$ , we have

$$\int_{[z+\rho/\sqrt{2}, 1]} \int_{[0, z-\rho/\sqrt{2}]} T(x, y) dy dx \leq u,$$

850 and

$$\int_{[0, z-\rho/\sqrt{2}]} \int_{[z+\rho/\sqrt{2}, 1]} T(x, y) dy dx \leq u.$$

851 Let  $\nu > 0$ . We take a grid  $\{x_j\} \in [0, 1]$  of spacing  $\sqrt{2}\nu$ . The sets

$$\bigcup_j [x_j + \rho/\sqrt{2}, 1] \times [0, x_j - \rho/\sqrt{2}], \quad \bigcup_j [0, x_j - \rho/\sqrt{2}] \times [x_j + \rho/\sqrt{2}, 1]$$

852 cover  $d_{\nu}^c$  (where  $d_{\nu}^c$  is the complement of  $d_{\nu}$ ). Hence,

$$\iint_{d_{\nu}^c} T(x, y) dy dx \leq \sum_{j=1}^{1/\sqrt{2}\nu} \int_{[x_j+\rho/\sqrt{2}, 1]} \int_{[0, x_j-\rho/\sqrt{2}]} T(x, y) dy dx$$

853

$$+ \sum_{j=1}^{1/\sqrt{2}\nu} \int_{[0, x_j-\rho/\sqrt{2}]} \int_{[x_j+\rho/\sqrt{2}, 1]} T(x, y) dy dx$$

$$\leq \frac{2}{\sqrt{2\nu}}u.$$

855 We take  $\frac{2}{\sqrt{2\nu}}u = t$ , for  $u \ll t \ll 1$ , namely,  $\nu = \sqrt{\frac{2u}{t}}$ . For example, we may take  $t = u^{1/3}$ , and  
 856  $\nu = \sqrt{2}u^{1/2-1/6} = \sqrt{2}u^{1/2}$ , assuming that  $\rho < u^{1/3}$ . Hence, we have

$$\iint_{d_{u^{1/3}}^c} T(x, y) \leq \sqrt{2}u^{1/3}.$$

857 To conclude, the probability of having an edge between nodes  $\lambda_i$  and  $\lambda_j$  in  $\overline{G'}_N$  which are further  
 858 away than  $u^{1/3}$ , namely,  $d_{\mathcal{M}}(\lambda_i, \lambda_j) > u^{1/3}$ , is less than  $\sqrt{2}u^{1/3}$ .

859 Suppose that  $G'$  is asymmetric. This means that symmetries of  $\mathcal{G}_{G \rightarrow G'}$  can only permute between  
 860 nodes that have an edge between them in the blown-up graph  $\overline{G'}_N$ . The probability of having an edge  
 861 between nodes further away than  $u^{1/3}$  is less than  $\sqrt{2}u^{1/3}$ . Hence, a symmetry in  $\mathcal{G}_{G \rightarrow G'}$  can be seen  
 862 as a small deformation, where for each node  $\lambda_i$  and a random uniform  $g \in \mathcal{G}_{G \rightarrow G'}$ , the probability  
 863 that  $\lambda_i$  is mapped by  $g$  to a node of distance less than  $u^{1/3}$  is more than  $1 - \sqrt{2}u^{1/3}$ . Any symmetry  
 864  $g$  in  $\mathcal{G}_{G \rightarrow G'}$  induces a measure preserving bijection  $\nu$  in  $\mathcal{M} = [0, 1]$ , by permuting the intervals of  
 865 the partition  $\mathcal{P}_N$  of Definition 1. As a result, the set of points that are mapped further away than  $u^{1/3}$   
 866 under  $\nu$  has probability upper bounded by  $\sqrt{2}u^{1/3}$ , and symmetries in  $\mathcal{G}_{G \rightarrow G'}$  can be seen as a small  
 867 deformation  $\nu$  according to Definition 9 (in high probability). This means that

$$\|f_{\mathcal{M}}(s) - f_{\mathcal{M}}(s \circ \nu) \circ \nu^{-1}\|_1 < C\sqrt{2}u^{1/3},$$

868 so by the triangle inequality, we have

$$\|f^*(s_G) - g^{-1}f^*(gs_G)\|_1 < 2e + C\sqrt{2}u^{1/3} = \epsilon', \quad (59)$$

869 Next, we show that  $f^*$  is approximately equivariant in a restricted sense, where we limit ourselves to  
 870 a symmetry group

$$\mathcal{G}_{G \rightarrow G'} = \mathcal{S}_{c_1} \times \mathcal{S}_{c_2} \dots \times \mathcal{S}_{c_M}$$

871 in Definition 3 without the symmetries of  $\overline{\mathcal{A}}_{G'}$ .

872 Equation (59) leads to

$$\|f^*(s_G) - \mathcal{Q}_{\mathcal{G}_{G \rightarrow G'}}(f^*)(s_G)\|_1 = \|f^*(s_G) - \frac{1}{|\mathcal{G}_{G \rightarrow G'}|} \sum_{g \in \mathcal{G}_{G \rightarrow G'}} g^{-1}f^*(gs_G)\|_1 \quad (60)$$

$$\leq \frac{1}{|\mathcal{G}_{G \rightarrow G'}|} \sum_{g \in \mathcal{G}_{G \rightarrow G'}} \|f^*(s_G) - g^{-1}f^*(gs_G)\|_1 < \epsilon'. \quad (61)$$

873 Since for any  $q \in L^2[0, 1] \cap L^\infty[0, 1]$  we have  $\|q\|_2^2 \leq \|q\|_\infty \|q\|_1$ , we can bound

$$\|f^*(s_G) - \mathcal{Q}_{\mathcal{G}_{G \rightarrow G'}}(f^*)(s_G)\|_2 < \sqrt{2\|f^*(s_G)\|_\infty} \sqrt{\epsilon'}.$$

874 Denote  $\|f^*\|_\infty := \int \|f^*(s_G)\|_\infty d\mu(s_G)$ , and suppose that  $\|f^*\|_\infty$  is finite. Hence, if  $\mu$  is a probabil-  
 875 ity measure, we have

$$\|f^* - \mathcal{Q}_{\mathcal{G}_{G \rightarrow G'}}(f^*)\|_\mu < \sqrt{2\|f^*\|_\infty} \sqrt{\epsilon'}.$$

876 This shows a modified version of approximate equivariance, where the approximation rate is also a  
 877 function of the size of the graph  $N$ , and goes to zero as  $N \rightarrow \infty$  and  $\epsilon \rightarrow 0$ .

878 In future work, we will extend this example to more general metric space  $\mathcal{M}$  and to non-trivial  
 879 symmetry groups  $\overline{\mathcal{A}}_{G'}$ . Intuitively, most random geometric graphs are “close to asymmetric.” This  
 880 means that for “most”  $G'$ , the symmetries of  $\overline{\mathcal{A}}_{G'}$  can only permute between nodes connected by an  
 881 edge, and so are the symmetries of  $\mathcal{G}_{G \rightarrow G'}$ . For this, we need to extend Definition 9 by treating  $G'$   
 882 probabilistically.

## 883 E Experiment Details

884 The source code will be made available in the final version of the paper. All experiments were  
 885 conducted on a server with 256 GB RAM and 4 NVIDIA RTX A5000 GPU cards.

886 **E.1 Application: Human Pose Estimation**

887 **Data.** We use the standard benchmark dataset, Human3.6M [65], with the same protocol as in [66]:  
 888 We train the models on 1.56M poses (from human subjects  $S_1, S_5, S_6, S_7, S_8$ ) and evaluate them  
 889 on 0.54M poses (from human subjects  $S_9, S_{11}$ ). We use the method described in [74] to normalize  
 890 the inputs (2D joint poses) to  $[-1, 1]$  and align the targets (3d joint poses) with the root joint.

891 **Graph Networks with Equivariant Modules.** We give detailed description of  $\mathcal{G}$ -Net and  
 892 its variants used in the experiments. Figure inset illustrates the architecture of  $\mathcal{G}$ -Net.  
 893 For the human skeleton graph with  $N = 16$ , we have  $f_{\mathcal{G}} : \mathbb{R}^{16 \times d} \rightarrow \mathbb{R}^{16 \times k}$ ,  
 894 where  $d, k$  represent the input dimension and output dimension (for each layer). Let  
 895  $f_{\mathcal{G}}[i, j] : \mathbb{R}^{16} \rightarrow \mathbb{R}^{16}$  denote its  $(i, j)$ -th slice.

896 1.  $\mathcal{G}$ -Net with strict equivariance using equivariant linear map  $f_{\mathcal{G}}$  (see Table 5):

- 897 •  $\mathcal{S}_{16}$ :  $f_{\mathcal{S}_{16}}[i, j] \in \mathbb{R}^{16 \times 16}$  is a diagonal matrix, with one learnable scalar  $a$   
 898 on diagonal and another learnable scalar  $b$  off diagonal.
- 899 • Relax- $\mathcal{S}_{16}$ : We relax  $f_{\mathcal{S}_{16}}[i, j]$  by having 16 different pairs of scalars  
 900  $(a_i, b_i), i \in [16]$ , such that each node  $i$  can map to itself and communicate  
 901 to its neighbors in a different way (controlled by  $(a_i, b_i)$ ), while still treat  
 902 all neighbors equally (by using the same  $b_i$  for nodes  $j \neq i$ ).
- 903 •  $(\mathcal{S}_2)^6$ : We use Algorithm 2 while replacing  $\mathcal{A}_G$  with the symmetry  
 904 group on a disconnected graph  $G_0$  consists of the orbits in  $G$ , i.e.  
 905  $G_0$  has the same nodes as  $G$ , but only retaining the edges among  
 906  $(1, 4), (2, 5), (3, 6), (10, 13), (11, 14), (12, 15)$ .
- 907 •  $\mathcal{A}_G$ : We use Algorithm 2.
- 908 •  $\mathcal{S}_2$ : We use Algorithm 2 while replacing  $\mathcal{A}_G$  with  $\mathcal{S}_2$  representing the  
 909 bilateral symmetry on the human skeleton graph (i.e., the left arms and  
 910 legs must flip together, similarly for the right arms and legs).
- 911 • Trivial: We allow  $f[i, j] \in \mathbb{R}^{16 \times 16}$  to be arbitrary, i.e., it has  $16 \times 16$   
 912 learnable scalars.

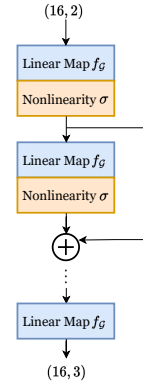

913 We remark that for  $\mathcal{S}_{16}$  and Relax- $\mathcal{S}_{16}$ , we implement them by tying weights; for  $(\mathcal{S}_2)^6, \mathcal{A}_G, \mathcal{S}_2$ , we  
 914 implement them by projecting to isotypic component as shown in Algorithm 2.

915 2.  $\mathcal{G}$ -Net augmented with graph convolution  $Af_{\mathcal{G}}(x)$ , denoted as  $\mathcal{G}$ -Net(gc) (see Table 5): We apply  
 916 the equivariant linear map  $f_{\mathcal{G}}$  in 1. and obtain the output  $f_{\mathcal{G}}(x) \in \mathbb{R}^{16 \times k}$ ; We then apply graph  
 917 convolution by multiplication from the left, i.e.,  $Af_{\mathcal{G}}(x) \in \mathbb{R}^{16 \times k}$ .

918 3.  $\mathcal{G}$ -Net augmented with graph convolution and learnable edge weights, denoted as  $\mathcal{G}$ -Net(gc+ew)  
 919 (see Table 1): We further learn the edge weights for the adjacency matrix  $A$ , by  $\text{softmax}(M \odot A)$   
 920 where  $M \in \mathbb{R}^{16}$  represents the learnable edge weights, and  $M_{i,j}$  is nonzero when  $A_{i,j} \neq 0$  and  
 921 0 elsewhere. This is inspired from SemGCN [66]. Besides the groups discussed in 1., we also  
 922 implemented Relax- $(\mathcal{S}_6)^2$  which corresponds to tying weights among the coarsened graph orbits,  
 923 consists of 4 spline nodes (singleton orbits) and 2 orbits for the left/right arm and leg nodes.

924 4.  $\mathcal{G}$ -Net augmented with graph locality constraints  $(A \odot f_{\mathcal{G}})(x)$ , denoted as  $\mathcal{G}$ -Net(pt) (see Table 5):  
 925 We perform pointwise multiplication  $A \odot f_{\mathcal{G}}[i, j]$  at each  $(i, j)$ -th slice of  $f_{\mathcal{G}}$ . In practice, we also  
 926 allow learnable edge weights as done in 3.

927 **Experimental Set-up.** We design  $\mathcal{G}$ -Net to have 4 layers (with batch normalization and residual  
 928 connections in between the hidden layers), 128 hidden units, and use ReLU nonlinearity. This allows  
 929  $\mathcal{G}$ -Net(gc+ew) to recover SemGCN [66] when choosing  $\mathcal{G} = \mathcal{S}_{16}$ . We train our models for maximally  
 930 30 epochs with early stopping. For comparison purpose, we use the same optimization routines as in  
 931 SemGCN [66] and perform the hyper-parameter search of learning rates  $\{0.001, 0.002\}$ .

932 **Evaluation.** Table 5 shows results of  $\mathcal{G}$ -Net and its variants when varying the choice of  $\mathcal{G}$ . We  
 933 observe that using the automorphism group  $\mathcal{A}_G$  does not give the best performance, while imposing  
 934 no symmetries (Trivial) or a relaxed version of  $\mathcal{S}_{16}$  yields better results.

<sup>3</sup>There is a typo in Table 1, where  $(\mathcal{S}_2)^6$  should be corrected to Relax- $\mathcal{S}_{16}$ , and  $(\mathcal{S}_6)^2$  should be corrected to Relax- $(\mathcal{S}_6)^2$ .

Table 5: 3D human pose prediction using  $\mathcal{G}$ -Net and its variants. Error ( $\pm$  std) measured by Mean Per-Joint Position Error (MPJPE) and MPJPE after rigid alignment (P-MPJPE) across 3 runs. All methods use the same hidden dimension  $d = 128$ . Bold type indicates the top-2 performance among each variant. “NA” indicates the loss fails to converge.

| MPJPE $\downarrow$     | $\mathcal{S}_{16}$ | Relax- $\mathcal{S}_{16}$          | $(\mathcal{S}_2)^6$ | $\mathcal{A}_G = (\mathcal{S}_2)^2$ | $\mathcal{S}_2$                    | Trivial                            |
|------------------------|--------------------|------------------------------------|---------------------|-------------------------------------|------------------------------------|------------------------------------|
| $\mathcal{G}$ -Net     | NA                 | <b>47.97 <math>\pm</math> 0.47</b> | 52.97 $\pm$ 0.79    | 48.30 $\pm$ 0.69                    | 48.95 $\pm$ 0.31                   | <b>42.86 <math>\pm</math> 0.64</b> |
| $\mathcal{G}$ -Net(gc) | NA                 | 54.50 $\pm$ 4.33                   | 52.97 $\pm$ 0.64    | 49.40 $\pm$ 1.37                    | <b>48.72 <math>\pm</math> 0.39</b> | <b>43.24 <math>\pm</math> 0.82</b> |
| $\mathcal{G}$ -Net(pt) | 41.54 $\pm$ 0.47   | <b>40.44 <math>\pm</math> 0.61</b> | 52.47 $\pm$ 0.48    | 40.63 $\pm$ 0.26                    | 48.19 $\pm$ 0.13                   | <b>38.41 <math>\pm</math> 0.31</b> |
| P-MPJPE $\downarrow$   | $\mathcal{S}_{16}$ | Relax- $\mathcal{S}_{16}$          | $(\mathcal{S}_2)^6$ | $\mathcal{A}_G = (\mathcal{S}_2)^2$ | $\mathcal{S}_2$                    | Trivial                            |
| $\mathcal{G}$ -Net     | NA                 | <b>36.45 <math>\pm</math> 0.56</b> | 41.66 $\pm$ 0.28    | 37.17 $\pm$ 0.59                    | 37.27 $\pm$ 0.27                   | <b>32.59 <math>\pm</math> 0.62</b> |
| $\mathcal{G}$ -Net(gc) | NA                 | 40.61 $\pm$ 0.99                   | 41.87 $\pm$ 0.80    | 37.62 $\pm$ 1.32                    | <b>36.97 <math>\pm</math> 0.78</b> | <b>33.05 <math>\pm</math> 0.81</b> |
| $\mathcal{G}$ -Net(pt) | 32.31 $\pm$ 0.03   | <b>31.11 <math>\pm</math> 0.68</b> | 41.45 $\pm$ 0.28    | 31.35 $\pm$ 0.14                    | 37.56 $\pm$ 0.12                   | <b>29.68 <math>\pm</math> 0.22</b> |

Table 6: 3D human pose prediction using  $\mathcal{G}$ -Net(gc+ew), where the models induced from each choice of  $\mathcal{G}$  are set to have roughly the same number of parameters.  $d$  denotes the number of hidden units.

| $\mathcal{G}$ -Net                  | Number of Parameters | Number of Epochs | MPJPE        | P-MPJPE      |
|-------------------------------------|----------------------|------------------|--------------|--------------|
| $\mathcal{S}_{16}$                  | 0.27M ( $d = 128$ )  | 50               | 43.48        | 34.96        |
| Relax- $\mathcal{S}_{16}$           | 0.27M ( $d = 32$ )   | 20               | <b>40.08</b> | <b>32.08</b> |
| $\mathcal{A}_G = (\mathcal{S}_2)^2$ | 0.22M ( $d = 16$ )   | 30               | 44.10        | 34.12        |
| Trivial                             | 0.22M ( $d = 10$ )   | 30               | 45.05        | 34.79        |

935 **Additional Evaluation.** Table 6 shows the experiments when we keep the number of parameters  
 936 roughly the same across different choices of  $\mathcal{G}$ .

## 937 E.2 Application: Traffic Flow Prediction

938 **Data.** The METR-LA traffic dataset, [67], contains traffic information collected from 207 sensors in  
 939 the highway of Los Angeles County from Mar 1st 2012 to Jun 30th 2012 [75]. We use the same traffic  
 940 data normalization and 70/10/20 train/validation/test data split as [67]. We consider two different  
 941 traffic graphs constructed from the pairwise road network distance matrix: (1) the sensor graph  $G$   
 942 introduced in [67] based on applying a thresholded Gaussian kernel (degree distribution in Figure  
 943 5e); (2) the sparser graph  $G_s$  based on applying the binary mask where the  $(i, j)$  entry is nonzero if  
 944 and only if nodes  $i, j$  lie on the same highway (degree distribution in Figure 5d). We construct the  
 945 second variant to more faithfully model the geometry of the highway sensors, illustrated in Figure 5a

946 **Graph coarsening.** We choose 2 clusters based on highway intersection and flow direction, indicated  
 947 by colors (Figure 5c(b)), and 9 clusters based on highway labels (Figure 5c(c)).

948 **Model.** We use a standard baseline, DCRNN proposed in [67]. DCRNN is built on a core recurrent  
 949 module, DCGRU cell, which iterates as follows: Let  $x_{i,t}, h_{i,t}$  denote the  $i$ -th node feature and hidden  
 950 state vector at time  $t$ ; Let  $X_t, R_t, H_{t-1}$  be the matrices of stacking feature vectors  $x_{i,t}, r_{i,t}, h_{i,t-1}$  as  
 951 rows.

$$z_{i,t} = \sigma_g(W_z x_{i,t} + U_z h_{i,t-1} + b_z) \quad (62)$$

$$r_{i,t} = \sigma_g(W_r x_t + U_r h_{t-1} + b_r) \quad (63)$$

$$\hat{h}_{i,t} = \phi_h \left( [A X W_h]_{[i,:]}^\top + [A (R_t \odot H_{t-1}) U_h]_{[i,:]}^\top + b_h \right) \quad (64)$$

$$h_{i,t} = z_t \odot h_{t-1} + (1 - z_t) \odot \hat{h}_t, \quad (65)$$

952 where  $W_z, U_z, b_z, U_r, W_r, b_r, W_h, U_h, b_h$  are learnable weights and biases,  $\sigma_g$  is the sigmoid func-  
 953 tion,  $\phi_g$  is the hyperbolic tangent, and  $h_{i,0} = 0$  for all  $i$  at initialization. The crucial different from a  
 954 vanilla GRU lies in eqn (64) where graph convolution replaces matrix multiplication.

955 We then modify the graph convolution in (64) from global weight sharing to tying weights among  
 956 clusters of nodes, similar to the implementation in Appendix E.1 for Relax- $\mathcal{S}_{16}$ . For example, in the  
 957 case of two clusters (orbits), we change  $XW_h$  to

$$\text{swap}(\text{concat}[X_{c_1} W_{h,c_1}; X_{c_2} W_{h,c_2}]), \quad (66)$$



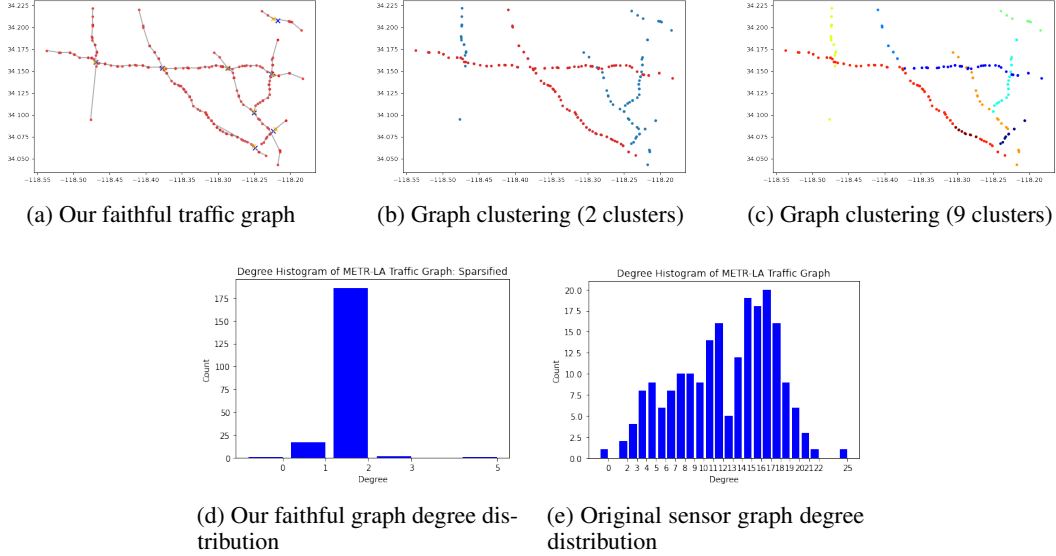

Figure 5: METR-LA traffic graph: visualization, clustering, and degree distribution

958 where  $X_{c_i}$  denotes the submatrix of  $X$  including the rows of nodes from cluster  $i$  only, and  
 959  $W_{h,c_1}, W_{h,c_2}$  are two learnable matrices. In words, we perform cluster-specific linear transformation,  
 960 combine the transformed features, and reorder the rows (i.e., swap) to ensure compatibility with the  
 961 graph convolution.

962 **Experiment Set-up.** For our experiments, we use DCRNN model with 1 RNN layer and 1 diffusion  
 963 step. We choose  $T' = 3$  (i.e., 3 historical graph signals) and  $T = 3$  (i.e., predict the next 3 period  
 964 graph signals). We train all variants for 30 epochs using ADAM optimizer with learning rate 0.01.  
 965 We report the test set performance selected by the best validation set performance.

## 966 E.2.1 Assumption Validation: Approximate Equivariant Map

967 Before applying our construction of approximate symmetries, we validate the assumption of the  
 968 target function  $f^*$  being an approximately equivariant mapping using a trained DCRNN model as a  
 969 proxy. We proceed as follows:

970 **Data.** We use the validation set of METR-LA (traffic graph signals in LA), which has 207 nodes and  
 971 consists of 14, 040 input and output signals. Each input  $X \in \mathbb{R}^{207 \times 2}$  represents the traffic volume  
 972 and speed in the past at the 207 stations, and output  $Y \in \mathbb{R}^{207}$  representing future traffic volume.

973 **Model.** We use a trained DCRNN model on our faithful graph, with input being 3 historical signals  
 974  $\mathbf{X} = (X_{T-3}, X_{T-2}, X_{T-1}) \in \mathbb{R}^{3 \times 207 \times 2}$  to predict the future signals  $\mathbf{Y} = (X_T, X_{T+1}, X_{T+2}) \in$   
 975  $\mathbb{R}^{3 \times 207}$ . We denote this model as  $f$ . It gives reasonable performance with Mean Absolute Error  $\approx 3$ ,  
 976 and serves as a good proxy for the target (unknown) function  $f^*$ .

977 **Neighbors.** We take our faithful traffic graph that originally has 397 non-loop edges, and only consider  
 978 a subset of 260 edges by thresholding the distance values to eliminate geometrically far-away nodes.  
 979 This defines our 260 neighboring node pairs.

**Equivariance error.** For each node pair  $(i, j)$ , we swap their input signals by interchanging the  
 $(i, j)$ -th slices in the node dimension of the tensor  $\mathbf{X}$ , denoted as  $\mathbf{X}_{(i,j)}$ , and check if the swapped  
 output  $\hat{\mathbf{Y}}_{(i,j)} = f(\mathbf{X}_{(i,j)})$  is close to the original output  $\hat{\mathbf{Y}} = f(\mathbf{X})$  with  $(i, j)$ -th slices swapped.  
 We measure ‘‘closeness’’ via the relative equivariant error at the node pair. Concretely, let  $\mathbf{X}[i, j]$   
 denote the tensor slices at the  $(i, j)$  node pair, and  $\mathbf{X}[j, i]$  being the swapped version by interchanging  
 $(i, j)$ -th slices. The relative different is computed as

$$|\hat{\mathbf{Y}}_{(i,j)}[j, i] - \hat{\mathbf{Y}}[i, j]| / \hat{\mathbf{Y}}[i, j],$$

980 where  $/$  denotes element-wise division. We then compute the mean relative equivariance error over  
981 all instances in the validation set, which equals to 5.17%. This gives concrete justification to enforce  
982 approximate equivariance in the traffic flow prediction problems.

## 983 References

- 984 [1] M. M. Bronstein, J. Bruna, Y. LeCun, A. Szlam, and P. Vandergheynst. Geometric deep learning:  
985 Going beyond euclidean data. *IEEE Signal Processing Magazine*, 34(4):18–42, 2017.
- 986 [2] Fernando Gama, Joan Bruna, and Alejandro Ribeiro. Stability properties of graph neural  
987 networks. *IEEE Transactions on Signal Processing*, 68:5680–5695, 2020.
- 988 [3] Michael M. Bronstein, Joan Bruna, Taco Cohen, and Petar Veličković. Geometric deep learning:  
989 Grids, groups, graphs, geodesics, and gauges, 2021.
- 990 [4] Carlo Rovelli and Marcus Gaul. Loop quantum gravity and the meaning of diffeomorphism  
991 invariance. In *Towards Quantum Gravity: Proceeding of the XXXV International Winter School  
992 on Theoretical Physics Held in Polanica, Poland, 2–11 February 1999*, pages 277–324. Springer,  
993 2000.
- 994 [5] Soledad Villar, David W Hogg, Weichi Yao, George A Kevrekidis, and Bernhard Schölkopf.  
995 The passive symmetries of machine learning. *arXiv preprint arXiv:2301.13724*, 2023.
- 996 [6] Mehryar Mohri, Afshin Rostamizadeh, and Ameet Talwalkar. *Foundations of machine learning*.  
997 MIT press, 2018.
- 998 [7] Alberto Bietti, Luca Venturi, and Joan Bruna. On the sample complexity of learning under  
999 invariance and geometric stability, 2021.
- 1000 [8] Bryn Elesedy and Sheheryar Zaidi. Provably strict generalisation benefit for equivariant models.  
1001 In *International Conference on Machine Learning*, pages 2959–2969. PMLR, 2021.
- 1002 [9] Song Mei, Theodor Misiakiewicz, and Andrea Montanari. Learning with invariances in random  
1003 features and kernel models. *arXiv preprint arXiv:2102.13219*, 2021.
- 1004 [10] Clare Lyle, Mark van der Wilk, Marta Kwiatkowska, Yarin Gal, and Benjamin Bloem-Reddy.  
1005 On the benefits of invariance in neural networks. *arXiv preprint arXiv:2005.00178*, 2020.
- 1006 [11] Bryn Elesedy. Group symmetry in pac learning. In *ICLR 2022 Workshop on Geometrical and  
1007 Topological Representation Learning*, 2022.
- 1008 [12] Bryn Elesedy. Provably strict generalisation benefit for invariance in kernel methods. *Advances  
1009 in Neural Information Processing Systems*, 34:17273–17283, 2021.
- 1010 [13] Arash Behboodi, Gabriele Cesa, and Taco Cohen. A pac-bayesian generalization bound for  
1011 equivariant networks. *arXiv preprint arXiv:2210.13150*, 2022.
- 1012 [14] Gregory Benton, Marc Finzi, Pavel Izmailov, and Andrew G Wilson. Learning invariances in  
1013 neural networks from training data. *Advances in neural information processing systems*, 33:  
1014 17605–17616, 2020.
- 1015 [15] Jameson Cahill, Dustin G Mixon, and Hans Parshall. Lie pca: Density estimation for symmetric  
1016 manifolds. *Applied and Computational Harmonic Analysis*, 65:279–295, 2023.
- 1017 [16] Vasco Portilheiro. A tradeoff between universality of equivariant models and learnability of  
1018 symmetries. *arXiv preprint arXiv:2210.09444*, 2022.
- 1019 [17] F. Scarselli, M. Gori, A. C. Tsoi, M. Hagenbuchner, and G. Monfardini. The graph neural  
1020 network model. *IEEE Transactions on Neural Networks*, 20(1):61–80, 2009.
- 1021 [18] J. Bruna, W. Zaremba, A. Szlam, and Y. LeCun. Spectral networks and deep locally connected  
1022 networks on graphs. In *International Conference on Learning Representation*, 2014.
- 1023 [19] Justin Gilmer, Samuel S. Schoenholz, Patrick F. Riley, Oriol Vinyals, and George E. Dahl.  
1024 Neural message passing for quantum chemistry. In *International Conference on Machine  
1025 Learning*, pages 1263–1272, 2017.
- 1026 [20] Thomas N. Kipf and Max Welling. Semi-supervised classification with graph convolutional  
1027 networks. In *International Conference on Learning Representations*, 2017.
- 1028 [21] Petar Veličković, Guillem Cucurull, Arantxa Casanova, Adriana Romero, Pietro Liò, and Yoshua  
1029 Bengio. Graph attention networks. In *International Conference on Learning Representations*,  
1030 2018.

- 1031 [22] Michaël Defferrard, Xavier Bresson, and Pierre Vandergheynst. Convolutional neural networks  
1032 on graphs with fast localized spectral filtering. In *Advances in Neural Information Processing*  
1033 *Systems*, pages 3837–3845, 2016.
- 1034 [23] F. Gama, A. G. Marques, G. Leus, and A. Ribeiro. Convolutional neural network architectures  
1035 for signals supported on graphs. *IEEE Transactions on Signal Processing*, 67(4):1034–1049,  
1036 2019.
- 1037 [24] R. Levie, F. Monti, X. Bresson, and M. M. Bronstein. Cayleynets: Graph convolutional neural  
1038 networks with complex rational spectral filters. *IEEE Transactions on Signal Processing*, 67(1):  
1039 97–109, 2019.
- 1040 [25] Zhengdao Chen, Lei Chen, Soledad Villar, and Joan Bruna. Can graph neural networks count  
1041 substructures? *Advances in neural information processing systems*, 33:10383–10395, 2020.
- 1042 [26] Erik Henning Thiede, Wenda Zhou, and Risi Kondor. Autobahn: Automorphism-based graph  
1043 neural nets, 2021. URL <https://arxiv.org/abs/2103.01710>.
- 1044 [27] Beatrice Bevilacqua, Fabrizio Frasca, Derek Lim, Balasubramaniam Srinivasan, Chen Cai,  
1045 Gopinath Balamurugan, Michael M Bronstein, and Haggai Maron. Equivariant subgraph  
1046 aggregation networks. *arXiv preprint arXiv:2110.02910*, 2021.
- 1047 [28] Giorgos Bouritsas, Fabrizio Frasca, Stefanos P Zafeiriou, and Michael Bronstein. Improving  
1048 graph neural network expressivity via subgraph isomorphism counting. *IEEE Transactions on*  
1049 *Pattern Analysis and Machine Intelligence*, 2022.
- 1050 [29] Fabrizio Frasca, Beatrice Bevilacqua, Michael M Bronstein, and Haggai Maron. Understanding  
1051 and extending subgraph gnns by rethinking their symmetries. *arXiv preprint arXiv:2206.11140*,  
1052 2022.
- 1053 [30] Bohang Zhang, Guhao Feng, Yiheng Du, Di He, and Liwei Wang. A complete expressiveness  
1054 hierarchy for subgraph gnns via subgraph weisfeiler-lehman tests. *CoRR*, abs/2302.07090,  
1055 2023.
- 1056 [31] Jianfei Gao, Yangze Zhou, and Bruno Ribeiro. Double permutation equivariance for knowledge  
1057 graph completion. *arXiv preprint arXiv:2302.01313*, 2023.
- 1058 [32] Haggai Maron, Heli Ben-Hamu, Nadav Shamir, and Yaron Lipman. Invariant and equivariant  
1059 graph networks. *arXiv preprint arXiv:1812.09902*, 2018.
- 1060 [33] Christopher Morris, Martin Ritzert, Matthias Fey, William L. Hamilton, Jan Eric Lenssen,  
1061 Gaurav Rattan, and Martin Grohe. Weisfeiler and leman go neural: Higher-order graph neural  
1062 networks. In *AAAI Conference on Artificial Intelligence*, pages 4602–4609, 2019.
- 1063 [34] Manzil Zaheer, Satwik Kottur, Siamak Ravanbakhsh, Barnabas Poczos, Russ R Salakhutdinov,  
1064 and Alexander J Smola. Deep sets. *Advances in neural information processing systems*, 30,  
1065 2017.
- 1066 [35] Taco Cohen and Max Welling. Group equivariant convolutional networks. In *International*  
1067 *conference on machine learning*, pages 2990–2999. PMLR, 2016.
- 1068 [36] Yashil Sukurdeep et al. *Elastic shape analysis of geometric objects with complex structures and*  
1069 *partial correspondences*. PhD thesis, Johns Hopkins University, 2023.
- 1070 [37] Jameson Cahill, Joseph W Iverson, Dustin G Mixon, and Daniel Packer. Group-invariant max  
1071 filtering. *arXiv preprint arXiv:2205.14039*, 2022.
- 1072 [38] Nathaniel Thomas, Tess Smidt, Steven Kearnes, Lusann Yang, Li Li, Kai Kohlhoff, and Patrick  
1073 Riley. Tensor field networks: Rotation-and translation-equivariant neural networks for 3d point  
1074 clouds. *arXiv:1802.08219*, 2018.
- 1075 [39] Fabian Fuchs, Daniel Worrall, Volker Fischer, and Max Welling. Se (3)-transformers: 3d  
1076 roto-translation equivariant attention networks. *Neural Information Processing Systems*, 33,  
1077 2020.
- 1078 [40] Mario Geiger and Tess Smidt. e3nn: Euclidean neural networks. *arXiv preprint*  
1079 *arXiv:2207.09453*, 2022.
- 1080 [41] Soledad Villar, David W Hogg, Kate Storey-Fisher, Weichi Yao, and Ben Blum-Smith. Scalars  
1081 are universal: Equivariant machine learning, structured like classical physics. *Advances in*  
1082 *Neural Information Processing Systems*, 34:28848–28863, 2021.

- 1083 [42] Ben Finkelshtein, Chaim Baskin, Haggai Maron, and Nadav Dym. A simple and universal  
1084 rotation equivariant point-cloud network. In *Topological, Algebraic and Geometric Learning*  
1085 *Workshops 2022*, pages 107–115. PMLR, 2022.
- 1086 [43] Risi Kondor, Zhen Lin, and Shubhendu Trivedi. Clebsch–gordan nets: a fully fourier space  
1087 spherical convolutional neural network. *Advances in Neural Information Processing Systems*,  
1088 31:10117–10126, 2018.
- 1089 [44] Maurice Weiler, Patrick Forré, Erik Verlinde, and Max Welling. Coordinate independent  
1090 convolutional networks–isometry and gauge equivariant convolutions on riemannian manifolds.  
1091 *arXiv preprint arXiv:2106.06020*, 2021.
- 1092 [45] Rui Wang, Robin Walters, and Rose Yu. Approximately equivariant networks for imperfectly  
1093 symmetric dynamics. In Kamalika Chaudhuri, Stefanie Jegelka, Le Song, Csaba Szepesvari,  
1094 Gang Niu, and Sivan Sabato, editors, *Proceedings of the 39th International Conference on*  
1095 *Machine Learning*, volume 162 of *Proceedings of Machine Learning Research*, pages 23078–  
1096 23091. PMLR, 17–23 Jul 2022. URL <https://proceedings.mlr.press/v162/wang22aa.html>.  
1097 [html](https://proceedings.mlr.press/v162/wang22aa.html).
- 1098 [46] Soledad Villar, Weichi Yao, David W Hogg, Ben Blum-Smith, and Bianca Dumitrascu. Dimensionless machine learning: Imposing exact units equivariance. *Journal of Machine Learning Research*, 24(109):1–32, 2023.
- 1101 [47] Taco S. Cohen, Mario Geiger, Jonas Koehler, and Max Welling. Spherical cnns, 2018.
- 1102 [48] Jiaqi Han, Wenbing Huang, Tingyang Xu, and Yu Rong. Equivariant graph hierarchy-based  
1103 neural networks. *Advances in Neural Information Processing Systems*, 35:9176–9187, 2022.
- 1104 [49] Vikas Garg, Stefanie Jegelka, and Tommi Jaakkola. Generalization and representational limits  
1105 of graph neural networks. In Hal Daumé III and Aarti Singh, editors, *Proceedings of the*  
1106 *37th International Conference on Machine Learning*, volume 119 of *Proceedings of Machine*  
1107 *Learning Research*, pages 3419–3430. PMLR, 13–18 Jul 2020. URL [https://proceedings](https://proceedings.mlr.press/v119/garg20c.html)  
1108 [mlr.press/v119/garg20c.html](https://proceedings.mlr.press/v119/garg20c.html).
- 1109 [50] Pascal Esser, Leena Chennuru Vankadara, and Debarghya Ghoshdastidar. Learning theory can  
1110 (sometimes) explain generalisation in graph neural networks. *Advances in Neural Information*  
1111 *Processing Systems*, 34:27043–27056, 2021.
- 1112 [51] Christopher Morris, Floris Geerts, Jan Tönshoff, and Martin Grohe. W1 meet vc, 2023.
- 1113 [52] Sohir Maskey, Ron Levie, Yunseok Lee, and Gitta Kutyniok. Generalization analysis of message  
1114 passing neural networks on large random graphs. In *Advances in Neural Information Processing*  
1115 *Systems*, 2022.
- 1116 [53] Ron Levie, Wei Huang, Lorenzo Bucci, Michael Bronstein, and Gitta Kutyniok. Transferability  
1117 of spectral graph convolutional neural networks. *Journal of Machine Learning Research*, 22  
1118 (272):1–59, 2021.
- 1119 [54] Luana Ruiz, Luiz Chamon, and Alejandro Ribeiro. Graphon neural networks and the trans-  
1120 ferability of graph neural networks. *Advances in Neural Information Processing Systems*, 33:  
1121 1702–1712, 2020.
- 1122 [55] Beatrice Bevilacqua, Yangze Zhou, and Bruno Ribeiro. Size-invariant graph representations for  
1123 graph classification extrapolations. In *International Conference on Machine Learning*, pages  
1124 837–851. PMLR, 2021.
- 1125 [56] Keyulu Xu, Mozhi Zhang, Jingling Li, Simon S Du, Ken-ichi Kawarabayashi, and Stefanie  
1126 Jegelka. How neural networks extrapolate: From feedforward to graph neural networks. *arXiv*  
1127 *preprint arXiv:2009.11848*, 2020.
- 1128 [57] Marc Finzi, Gregory Benton, and Andrew G Wilson. Residual pathway priors for soft equiv-  
1129 ariance constraints. *Advances in Neural Information Processing Systems*, 34:30037–30049,  
1130 2021.
- 1131 [58] Alexander Bogatskiy, Sanmay Ganguly, Thomas Kipf, Risi Kondor, David W Miller, Daniel  
1132 Murnane, Jan T Offermann, Mariel Pettee, Phiala Shanahan, Chase Shimmin, et al. Symmetry  
1133 group equivariant architectures for physics. *arXiv preprint arXiv:2203.06153*, 2022.
- 1134 [59] Stéphane Mallat. Group invariant scattering. *Communications on Pure and Applied Mathematics*,  
1135 65(10):1331–1398, 2012. doi: <https://doi.org/10.1002/cpa.21413>.

- 1136 [60] William Fulton and Joe Harris. *Representation theory: a first course*, volume 129. Springer  
1137 Science & Business Media, 2013.
- 1138 [61] Siamak Ravanbakhsh, Jeff Schneider, and Barnabas Poczos. Equivariance through parameter-  
1139 sharing. In *International conference on machine learning*, pages 2892–2901. PMLR, 2017.
- 1140 [62] László Lovász and Balázs Szegedy. Limits of dense graph sequences. *Journal of Combinatorial*  
1141 *Theory, Series B*, 96(6):933–957, 2006.
- 1142 [63] Christian Borgs, Jennifer T Chayes, László Lovász, Vera T Sós, and Katalin Vesztegombi.  
1143 Convergent sequences of dense graphs i: Subgraph frequencies, metric properties and testing.  
1144 *Advances in Mathematics*, 219(6):1801–1851, 2008.
- 1145 [64] László Lovász and Balázs Szegedy. Szemerédi’s lemma for the analyst. *GAFAP Geometric And*  
1146 *Functional Analysis*, 17(1):252–270, 2007.
- 1147 [65] Catalin Ionescu, Dragos Papava, Vlad Olaru, and Cristian Sminchisescu. Human3. 6m: Large  
1148 scale datasets and predictive methods for 3d human sensing in natural environments. *IEEE*  
1149 *transactions on pattern analysis and machine intelligence*, 36(7):1325–1339, 2013.
- 1150 [66] Long Zhao, Xi Peng, Yu Tian, Mubbasir Kapadia, and Dimitris N Metaxas. Semantic graph  
1151 convolutional networks for 3d human pose regression. In *Proceedings of the IEEE/CVF*  
1152 *conference on computer vision and pattern recognition*, pages 3425–3435, 2019.
- 1153 [67] Yaguang Li, Rose Yu, Cyrus Shahabi, and Yan Liu. Diffusion convolutional recurrent neural  
1154 network: Data-driven traffic forecasting. *arXiv preprint arXiv:1707.01926*, 2017.
- 1155 [68] Bruce Sagan. *The symmetric group: representations, combinatorial algorithms, and symmetric*  
1156 *functions*, volume 203. Springer Science & Business Media, 2001.
- 1157 [69] Jean-Pierre Serre et al. *Linear representations of finite groups*, volume 42. Springer, 1977.
- 1158 [70] Trevor Hastie, Andrea Montanari, Saharon Rosset, and Ryan J Tibshirani. Surprises in high-  
1159 dimensional ridgeless least squares interpolation. *The Annals of Statistics*, 50(2):949–986,  
1160 2022.
- 1161 [71] Ningyuan Teresa, David W. Hogg, and Soledad Villar. Dimensionality reduction, regularization,  
1162 and generalization in overparameterized regressions. *SIAM Journal on Mathematics of Data*  
1163 *Science*, 4(1):126–152, feb 2022. doi: 10.1137/20m1387821. URL <https://doi.org/10.1137/20m1387821>.
- 1164
- 1165 [72] Somesh Das Gupta. Some aspects of discrimination function coefficients. *Sankhyā: The Indian*  
1166 *Journal of Statistics, Series A*, pages 387–400, 1968.
- 1167 [73] Ron Levie. A graphon-signal analysis of graph neural networks. 2023.
- 1168 [74] Dario Pavlo, Christoph Feichtenhofer, David Grangier, and Michael Auli. 3d human pose  
1169 estimation in video with temporal convolutions and semi-supervised training. In *Proceedings of*  
1170 *the IEEE/CVF conference on computer vision and pattern recognition*, pages 7753–7762, 2019.
- 1171 [75] Hosagrahar V Jagadish, Johannes Gehrke, Alexandros Labrinidis, Yannis Papakonstantinou,  
1172 Jignesh M Patel, Raghu Ramakrishnan, and Cyrus Shahabi. Big data and its technical challenges.  
1173 *Communications of the ACM*, 57(7):86–94, 2014.
